# Supplementary material for: Effect of branching in the alkyl chain of diglycolamide on the sequestration of tetravalent actinides: solvent extraction and theoretical studies
Source: Royal Society of Chemistry journal article supplement (doi:10.1039/d4dt02176b), 2024-01-01
Supplement: d4dt02176b1.pdf [file d4dt02176b1.pdf]

# Effect of branching in the alkyl chain of diglycolamides on the sequestration of tetravalent actinides: Solvent extraction and theoretical studies

Rajesh B. Gujar, Parveen K. Verma, Arunasis Bhattacharyya, Prasanta K. Mohapatra\*, Richard J. M. Egberink, Jurriaan Huskens and Willem Verboom\*

## Contents

|                                                                                                              |    |
|--------------------------------------------------------------------------------------------------------------|----|
| Valence adjustment and purification of actinide tracers.....                                                 | 2  |
| Neptunium(IV).....                                                                                           | 3  |
| Plutonium(IV).....                                                                                           | 3  |
| Thorium(IV).....                                                                                             | 3  |
| Cartesian coordinates of the optimized structures of the An <sup>4+</sup> complexes of DGA derivatives ..... | 8  |
| Th(IV)- <i>n</i> -Butyl DGA .....                                                                            | 8  |
| Th(IV)- <i>iso</i> -Butyl DGA .....                                                                          | 11 |
| Th(IV)- <i>n</i> -Amyl DGA.....                                                                              | 14 |
| Th(IV)- <i>iso</i> -Amyl DGA .....                                                                           | 17 |
| Np(IV)- <i>n</i> -Butyl DGA.....                                                                             | 20 |
| Np(IV)- <i>iso</i> -Butyl DGA .....                                                                          | 23 |
| Np(IV)- <i>n</i> -Amyl DGA .....                                                                             | 26 |
| Np(IV)- <i>iso</i> -Amyl DGA.....                                                                            | 29 |
| Pu(IV)- <i>n</i> -Butyl DGA .....                                                                            | 32 |
| Pu(IV)- <i>iso</i> -Butyl DGA.....                                                                           | 35 |
| Pu(IV)- <i>n</i> -Amyl DGA .....                                                                             | 38 |
| Pu(IV)- <i>iso</i> -Amyl DGA .....                                                                           | 41 |

## Table of Figures

|                                                                                                                                                                                                                                |   |
|--------------------------------------------------------------------------------------------------------------------------------------------------------------------------------------------------------------------------------|---|
| Figure S1. Effect of feed acidity in the extraction of (a) Np(IV) and (b) Th(IV) by different DGA derivatives, solvent: octanol, T: 298 K. ....                                                                                | 4 |
| Figure S2. Effect of varying octanol content on the extraction of (a) Np(IV) and (b) Th(IV) by different DGA derivatives, T : 298 K. ....                                                                                      | 5 |
| Figure S3. Comparison of the distribution ratio of different tetravalent actinides with <i>n</i> -butyl DGA derivative TMDGA in 30% octanol + 70% <i>n</i> -dodecane and pure octanol at 3 M HNO <sub>3</sub> , T: 298 K. .... | 5 |
| Figure S 4. Effect of nitrate activity on the extraction of (a) Np(IV), and (b) Th(IV) by different DGA derivatives, solvent: 30% octanol + 70% <i>n</i> -dodecane, [HNO <sub>3</sub> ] : 0.5 M T: 298 K. ....                 | 6 |
| Figure S5. Water and acid uptake by octanol- <i>n</i> -dodecane mixtures, [HNO <sub>3</sub> ]: 3 M HNO <sub>3</sub> , T : 298 K. ....                                                                                          | 7 |
| Figure S6. Acid uptake by octanol- <i>n</i> -dodecane mixtures, [HNO <sub>3</sub> ]: 3 M HNO <sub>3</sub> , T: 298 K. ....                                                                                                     | 7 |
| Figure S7. Water uptake by octanol- <i>n</i> -dodecane mixtures, [HNO <sub>3</sub> ]: 3 M HNO <sub>3</sub> , T: 298 K. ....                                                                                                    | 8 |

## **Valence adjustment and purification of actinide tracers**

### **Neptunium(IV)**

A ferrous sulfamate solution (0.3 M) was freshly prepared by dissolving a known amount of iron powder (BDH) in sulfamic acid (Aldrich). The resultant Fe(II) sulfamate solution along with a few drops of hydroxylamine nitrate (1 M) was used for as the conversion of Np into its Np(IV) state. A HTTA solution in xylene was used for the extraction of Np(IV) from 1 M HNO<sub>3</sub> medium. The Np(IV) loaded organic solution was back extracted with 8 M HNO<sub>3</sub>. The back extracted aqueous phase was washed multiple times to remove any traces of organic impurities. The purity of the tracer was ascertained by  $\alpha$ - and  $\gamma$ -ray spectrometry.

### **Plutonium(IV)**

The oxidation state of Pu was adjusted to the Pu(IV) state using a 0.05 M solution of NaNO<sub>2</sub> (Merck). Ammonium metavanadate (Aldrich) was used as the holding oxidant for Pu(IV) stabilization. The Pu(IV) was purified using Dowex 1X8 anion exchange resin and the purity of the tracer was ascertained by  $\alpha$ - and  $\gamma$ -ray spectrometry.

### **Thorium(IV)**

Th(IV) was separated from an aged uranyl solution kept in 6 M HCl. Uranium has tendency to form an anionic tetrachloro complex and hence a liquid anion exchanger was used for its separation and purification. 0.1 M Aliquat 336 was dissolved in chloroform and used for the separation of U(VI) from Th(IV). The aqueous phase containing Th(IV) was washed with 0.1 M Aliquat 336-chloroform for better purification. The purity of the tracer was ascertained by  $\alpha$ - and  $\gamma$ -ray spectrometry.

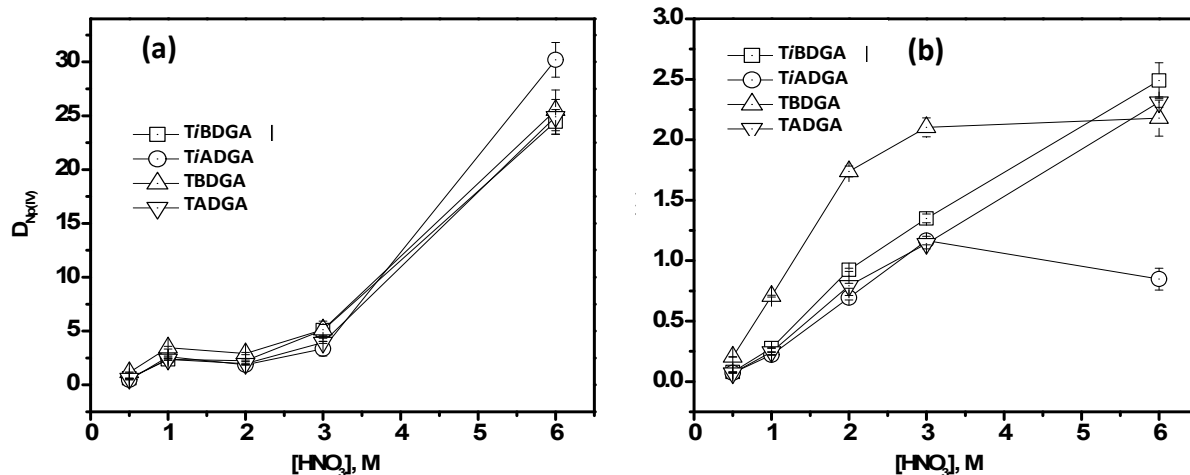

**Figure S1.** Effect of feed acidity in the extraction of (a) Np(IV) and (b) Th(IV) by different DGA derivatives, solvent: octanol, T: 298 K.

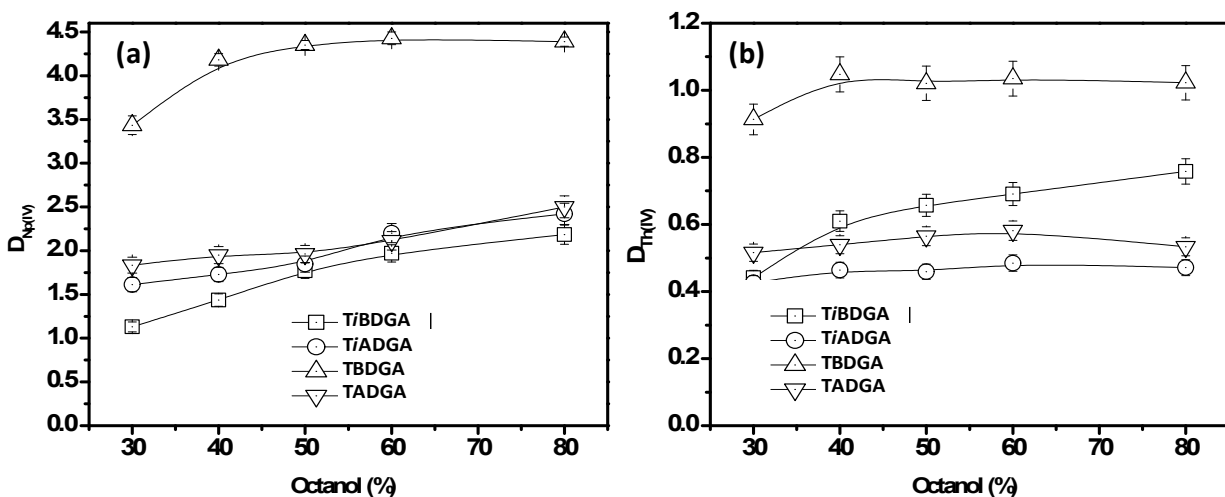

**Figure S2.** Effect of varying octanol content on the extraction of (a) Np(IV) and (b) Th(IV) by different DGA derivatives, T : 298 K.

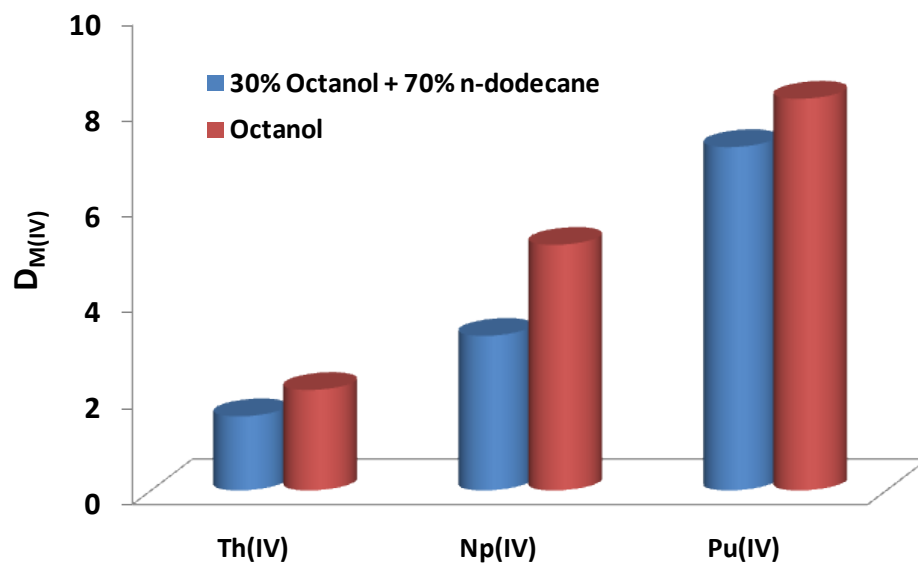

**Figure S3.** Comparison of the distribution ratio of different tetravalent actinides with *n*-butyl DGA derivative TMDGA in 30% octanol + 70% *n*-dodecane and pure octanol at 3 M HNO<sub>3</sub>, T: 298 K.

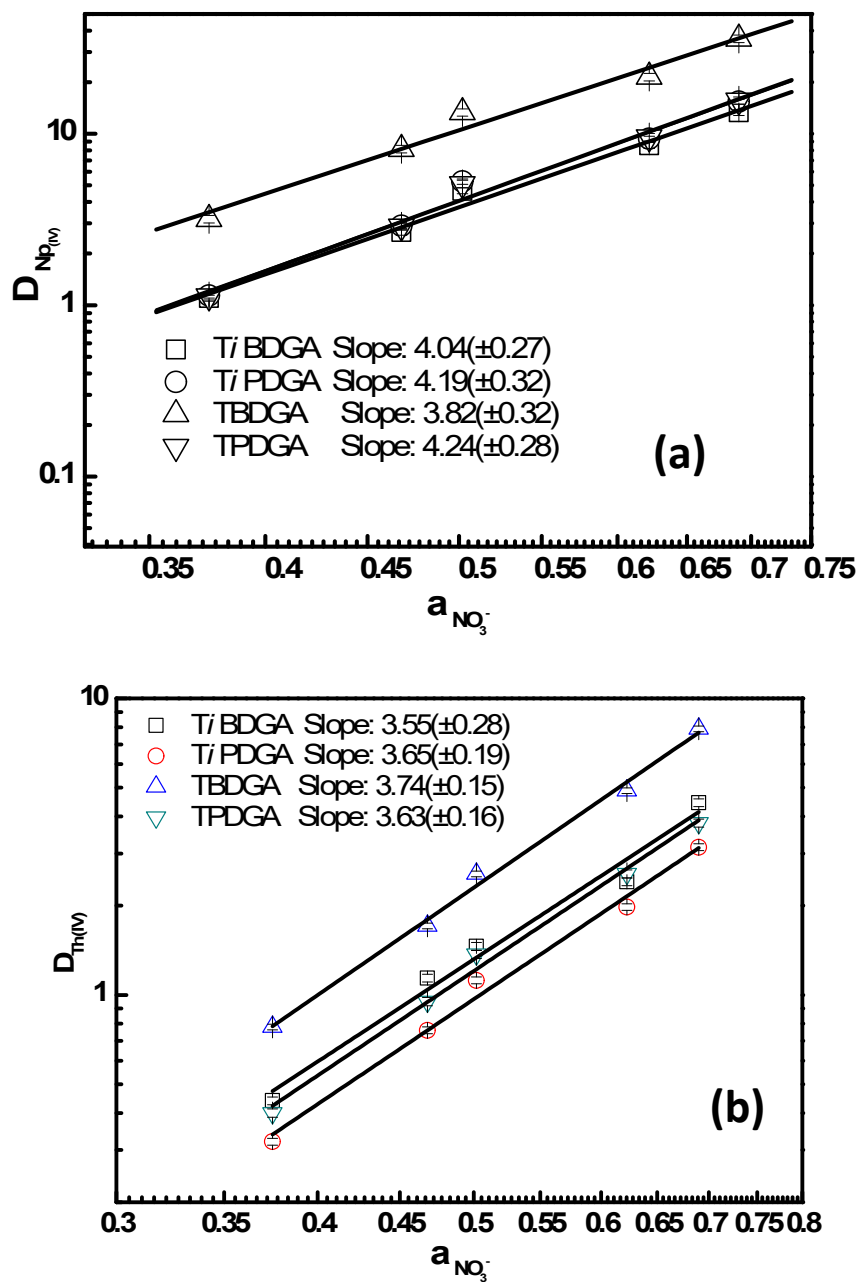

**Figure S 4.** Effect of nitrate activity on the extraction of (a) Np(IV), and (b) Th(IV) by different DGA derivatives, solvent: 30% octanol + 70% *n*-dodecane, [HNO<sub>3</sub>] : 0.5 M T: 298 K.

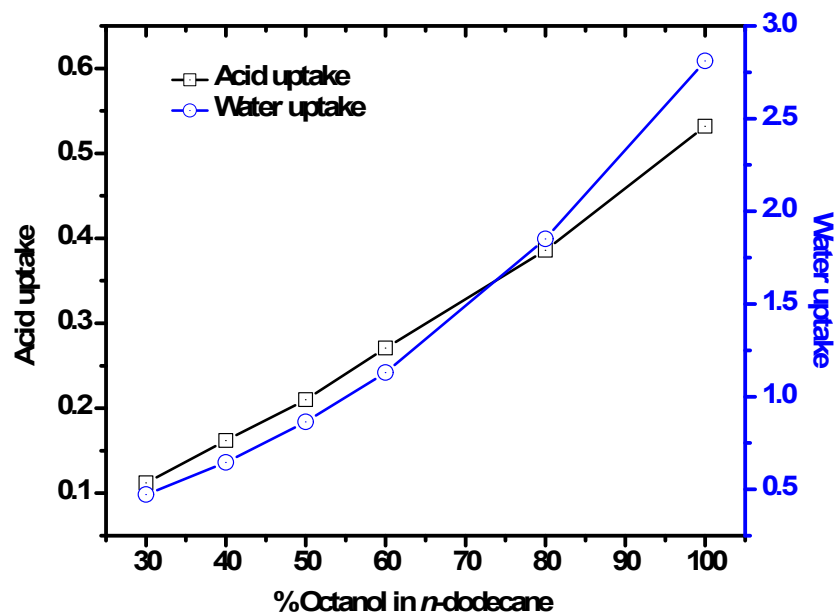

**Figure S5.** Water and acid uptake by octanol-*n*-dodecane mixtures, [HNO<sub>3</sub>]: 3 M HNO<sub>3</sub>, T : 298 K.

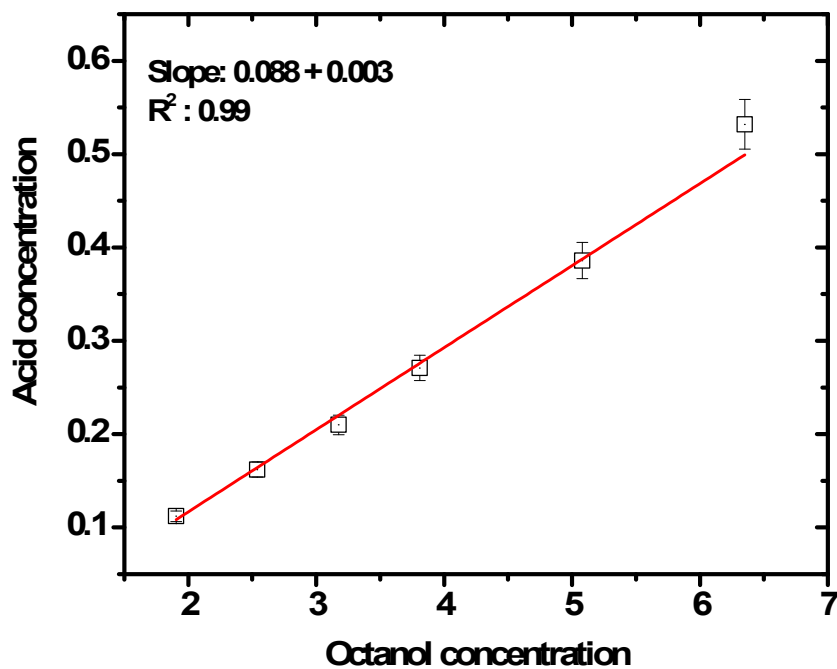

**Figure S6.** Acid uptake by octanol-*n*-dodecane mixtures, [HNO<sub>3</sub>]: 3 M HNO<sub>3</sub>, T: 298 K.

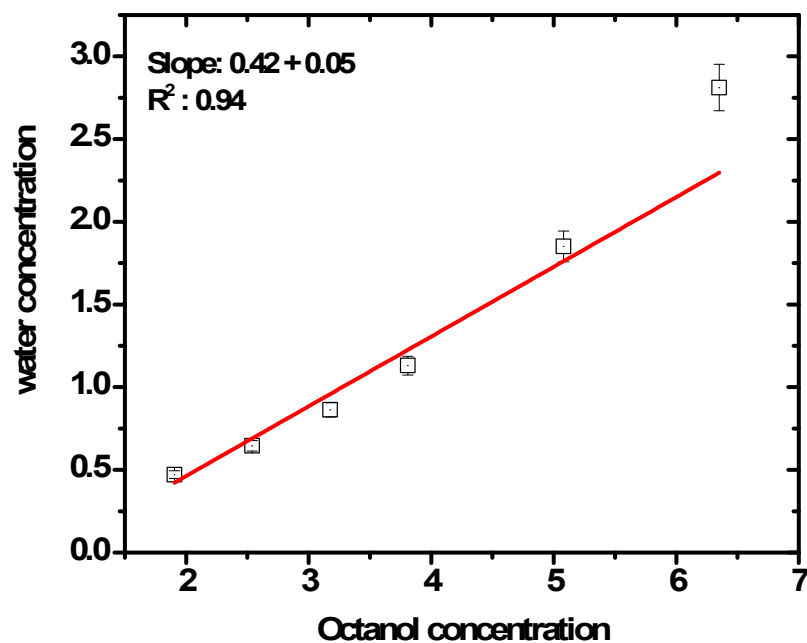

**Figure S7.** Water uptake by octanol-*n*-dodecane mixtures, [HNO<sub>3</sub>]: 3 M HNO<sub>3</sub>, T: 298 K.

**Cartesian coordinates of the optimized structures of the An<sup>4+</sup> complexes of DGA derivatives**

**Th(IV)-*n*-Butyl DGA**

|   |            |            |            |
|---|------------|------------|------------|
| C | -6.1488891 | -4.7828933 | 3.8359690  |
| C | -4.7125565 | -4.3192764 | 3.5346215  |
| C | -4.0992353 | -5.0689788 | 2.3389885  |
| N | -2.6998583 | -4.6877830 | 2.0467468  |
| C | -2.3677067 | -3.7388498 | 1.1653565  |
| C | -3.4805845 | -3.0401859 | 0.3723073  |
| O | -2.8461429 | -2.0393493 | -0.4182605 |
| C | -3.7179760 | -1.2707999 | -1.2486489 |
| C | -2.8167331 | -0.2901524 | -2.0110388 |
| N | -3.3569025 | 0.6679289  | -2.7617990 |
| C | -4.8171846 | 0.8600779  | -2.9009373 |
| C | -5.4010324 | 1.8960112  | -1.9247173 |
| C | -6.9043537 | 2.1313666  | -2.1557118 |
| C | -1.6432492 | -5.3754802 | 2.8193941  |
| C | -1.1921731 | -6.6997041 | 2.1817119  |
| C | -0.1598084 | -7.4412547 | 3.0486416  |
| O | -1.1692882 | -3.3926313 | 0.9437220  |
| O | 0.1691806  | -2.9843623 | -1.5799222 |
| C | 1.2027578  | -3.6842826 | -1.7898815 |
| N | 1.3134262  | -4.5072099 | -2.8386659 |
| C | 2.5040553  | -5.3477535 | -3.0915835 |



|   |            |            |            |
|---|------------|------------|------------|
| C | 2.3896643  | -6.7758869 | -2.5324377 |
| C | 3.5879270  | -7.6569595 | -2.9285966 |
| O | -1.5609090 | -0.4407924 | -1.8879763 |
| O | 1.9193330  | -2.7921592 | 0.2984952  |
| C | 2.9722535  | -2.3494114 | 1.1496477  |
| C | 2.3701916  | -1.3002721 | 2.0861587  |
| N | 3.0708687  | -0.8317389 | 3.1170533  |
| C | 4.4392797  | -1.2895395 | 3.4420243  |
| C | 4.4853744  | -2.3999347 | 4.5047080  |
| C | 5.9264062  | -2.7823576 | 4.8874779  |
| C | 2.3736104  | -3.5595369 | -0.8114299 |
| O | 1.1965884  | -0.8890189 | 1.8221219  |
| C | -2.4770212 | 1.6378877  | -3.4574825 |
| C | -2.1383406 | 1.2303656  | -4.8996048 |
| C | -1.2729591 | 2.2889439  | -5.6065011 |
| C | 2.4830043  | 0.2209583  | 3.9824119  |
| C | 2.8044778  | 1.6454378  | 3.5012877  |
| C | 2.2547637  | 2.7150614  | 4.4622437  |
| C | 0.2146357  | -4.5933245 | -3.8254837 |
| C | 0.4219610  | -3.6777855 | -5.0433834 |
| C | -0.6972656 | -3.8378724 | -6.0868085 |
| H | -4.7001368 | -3.2216211 | 3.3368551  |
| H | 2.2990764  | -6.7366410 | -1.4208675 |
| H | -4.0100116 | -3.7669008 | -0.2901945 |
| H | -4.2310095 | -2.5806615 | 1.0568538  |
| H | -4.0974364 | -6.1635019 | 2.5320251  |
| H | -4.7169147 | -4.9284599 | 1.4273052  |
| H | -6.1443559 | -5.8793043 | 4.0387669  |
| H | -6.7804677 | -4.6434716 | 2.9269349  |
| H | -2.0517752 | -5.5523486 | 3.8372298  |
| H | -0.7903557 | -4.6745560 | 2.9178255  |
| H | -0.7642374 | -6.4893893 | 1.1741117  |
| H | -0.6010748 | -7.6425134 | 4.0526328  |
| H | 0.7155771  | -6.7735162 | 3.2303440  |
| H | -4.4674702 | -0.7290758 | -0.6276755 |
| H | -4.2624890 | -1.9434406 | -1.9549082 |
| H | -5.3282497 | -0.1201834 | -2.7923251 |
| H | -4.9957674 | 1.1768162  | -3.9512545 |
| H | -4.8516507 | 2.8582551  | -2.0374487 |
| H | -7.0639727 | 2.4666019  | -3.2070661 |
| H | -7.4511667 | 1.1638738  | -2.0580637 |
| H | -1.5563010 | 1.7485947  | -2.8504896 |
| H | -3.0076503 | 2.6133337  | -3.4420110 |
| H | -1.6044153 | 0.2524275  | -4.8859519 |
| H | -0.3341203 | 2.4432617  | -5.0247246 |
| H | -1.8061730 | 3.2679869  | -5.5920292 |
| H | 3.7874826  | -1.8834227 | 0.5431256  |
| H | 3.4028418  | -3.2093829 | 1.7131845  |
| H | 4.9942144  | -0.3943781 | 3.7969121  |
| H | 4.9508110  | -1.6108300 | 2.5099430  |
| H | 3.9345813  | -2.0630190 | 5.4131217  |

|   |            |            |            |
|---|------------|------------|------------|
| H | 6.4531296  | -1.8785656 | 5.2729231  |
| H | 6.4832049  | -3.0937900 | 3.9719161  |
| H | 2.8826923  | 0.0501010  | 5.0047999  |
| H | 1.3874869  | 0.0558058  | 4.0150377  |
| H | 2.3721370  | 1.7924099  | 2.4848552  |
| H | 2.6923492  | 2.5577239  | 5.4761333  |
| H | 1.1545559  | 2.5748458  | 4.5769650  |
| H | 2.7303200  | -4.5579827 | -0.4685086 |
| H | 3.2201722  | -3.0356949 | -1.3179838 |
| H | 3.4079238  | -4.8373175 | -2.6974519 |
| H | 2.6384020  | -5.3802128 | -4.1937488 |
| H | 3.6527651  | -7.7031356 | -4.0404318 |
| H | 4.5332142  | -7.1726463 | -2.5876143 |
| H | -0.7273081 | -4.3380964 | -3.3000937 |
| H | 0.1483252  | -5.6564394 | -4.1427645 |
| H | 0.4741166  | -2.6198249 | -4.6978042 |
| H | -1.6800073 | -3.6086322 | -5.6102291 |
| H | -0.7543955 | -4.9052050 | -6.4044433 |
| N | 1.5032937  | 0.7394422  | -1.1468847 |
| O | 1.6149919  | -0.5529756 | -1.3252612 |
| O | 2.2529300  | 1.5340800  | -1.6495457 |
| O | 0.5149858  | 1.0650672  | -0.3785351 |
| H | 3.9419565  | -3.2989763 | 4.1279387  |
| H | -5.2220278 | 1.5655402  | -0.8745227 |
| H | -3.0796070 | 1.0740818  | -5.4775039 |
| H | -4.0735634 | -4.4739356 | 4.4340318  |
| H | -2.0765047 | -7.3590894 | 2.0184064  |
| H | 1.4471936  | -7.2413309 | -2.9031512 |
| H | 3.9084214  | 1.7677214  | 3.4025393  |
| H | 1.4039297  | -3.9040049 | -5.5209649 |
| C | -6.7821456 | -4.0429646 | 5.0210908  |
| H | -7.8161042 | -4.4045958 | 5.2069032  |
| H | -6.1997889 | -4.1988189 | 5.9560906  |
| H | -6.8377257 | -2.9467942 | 4.8366660  |
| C | 0.3149441  | -8.7605514 | 2.4262418  |
| H | 0.7988628  | -8.5961751 | 1.4368041  |
| H | 1.0543913  | -9.2684947 | 3.0819505  |
| H | -0.5319962 | -9.4655327 | 2.2718779  |
| C | -7.5029538 | 3.1624965  | -1.1905876 |
| H | -7.0041866 | 4.1518262  | -1.2923100 |
| H | -8.5854348 | 3.3113609  | -1.3914371 |
| H | -7.3988913 | 2.8395411  | -0.1306302 |
| C | -0.9296958 | 1.9156459  | -7.0538616 |
| H | -0.2988422 | 2.6978756  | -7.5278561 |
| H | -0.3678103 | 0.9558024  | -7.1056431 |
| H | -1.8467759 | 1.8051720  | -7.6745097 |
| C | -0.4999679 | -2.9481649 | -7.3207346 |
| H | -0.4689515 | -1.8693920 | -7.0470731 |
| H | 0.4505777  | -3.1880962 | -7.8471574 |
| H | -1.3275090 | -3.0872040 | -8.0489688 |
| C | 3.5021359  | -9.0785530 | -2.3593973 |

|    |            |            |            |
|----|------------|------------|------------|
| H  | 2.5832527  | -9.6017179 | -2.7067631 |
| H  | 4.3737649  | -9.6879881 | -2.6803985 |
| H  | 3.4894409  | -9.0735270 | -1.2462934 |
| N  | -2.2845750 | 0.0878717  | 1.8916966  |
| O  | -3.0783410 | 0.6245753  | 2.6219012  |
| O  | -1.6836796 | -1.0245186 | 2.1868228  |
| O  | -1.9639764 | 0.5562940  | 0.7215201  |
| Th | -0.3571043 | -1.2424030 | 0.0381120  |
| C  | 5.9904866  | -3.9005522 | 5.9353980  |
| H  | 7.0435236  | -4.1445641 | 6.1915150  |
| H  | 5.4777798  | -3.6048101 | 6.8777590  |
| H  | 5.5103701  | -4.8347941 | 5.5666453  |
| C  | 2.5455567  | 4.1464028  | 3.9929936  |
| H  | 2.0813552  | 4.3532033  | 3.0028166  |
| H  | 2.1427992  | 4.8893877  | 4.7142892  |
| H  | 3.6390577  | 4.3301617  | 3.8990104  |

### **Th(IV)-*iso*-Butyl DGA**

|   |            |            |            |
|---|------------|------------|------------|
| C | -6.2998852 | -4.5712444 | 3.6458251  |
| C | -4.8395331 | -4.1084392 | 3.4901863  |
| C | -4.1474564 | -5.0183649 | 2.4438700  |
| N | -2.7424735 | -4.6752464 | 2.1205155  |
| C | -2.4190673 | -3.7559472 | 1.2036368  |
| C | -3.5342570 | -3.0944506 | 0.3846350  |
| O | -2.9103089 | -2.1010330 | -0.4236176 |
| C | -3.7998233 | -1.3496474 | -1.2540034 |
| C | -2.9194740 | -0.3434863 | -2.0061311 |
| N | -3.4617145 | 0.6171666  | -2.7530312 |
| C | -4.9206077 | 0.8022092  | -2.9227147 |
| C | -5.5329762 | 1.9745826  | -2.1181039 |
| C | -6.9906899 | 2.1730421  | -2.5723209 |
| C | -1.6551385 | -5.3443197 | 2.8712701  |
| C | -0.9940213 | -6.5294805 | 2.1295426  |
| C | 0.1493394  | -7.0772454 | 3.0025816  |
| O | -1.2215733 | -3.4176106 | 0.9622659  |
| O | 0.0969751  | -3.0265260 | -1.5791460 |
| C | 1.1431810  | -3.7081258 | -1.7897362 |
| N | 1.2604052  | -4.5385314 | -2.8332010 |
| C | 2.4671919  | -5.3673461 | -3.0611852 |
| C | 2.4884942  | -6.7390451 | -2.3423330 |
| C | 3.8359907  | -7.4245536 | -2.6343676 |
| O | -1.6608950 | -0.4734991 | -1.8785066 |
| O | 1.8568052  | -2.7768838 | 0.2820856  |
| C | 2.9055703  | -2.3292745 | 1.1364537  |
| C | 2.2985521  | -1.2864182 | 2.0761424  |
| N | 2.9954213  | -0.8338087 | 3.1198479  |
| C | 4.3358097  | -1.3614511 | 3.4671163  |
| C | 4.3562109  | -2.6424443 | 4.3388175  |
| C | 5.8232478  | -3.0586241 | 4.5537726  |

|   |            |            |            |
|---|------------|------------|------------|
| C | 2.3215588  | -3.5381070 | -0.8285061 |
| O | 1.1363449  | -0.8603519 | 1.7869322  |
| C | -2.5589157 | 1.5970665  | -3.4114404 |
| C | -1.8918646 | 1.1065151  | -4.7168850 |
| C | -0.9265028 | 2.2010672  | -5.2071303 |
| C | 2.4545024  | 0.2751386  | 3.9453349  |
| C | 3.0998359  | 1.6526162  | 3.6622273  |
| C | 2.5028888  | 2.6777209  | 4.6441086  |
| C | 0.1513497  | -4.6125039 | -3.8137502 |
| C | 0.1404155  | -3.4779521 | -4.8652540 |
| C | -1.0875337 | -3.6686516 | -5.7739611 |
| H | -4.8495284 | -3.0669612 | 3.0880856  |
| H | 2.4314356  | -6.5483356 | -1.2433411 |
| H | -4.0420795 | -3.8493395 | -0.2639416 |
| H | -4.3024458 | -2.6323151 | 1.0458692  |
| H | -4.1410001 | -6.0659819 | 2.8098055  |
| H | -4.7379298 | -5.0310812 | 1.5026212  |
| H | -6.3529312 | -5.6043268 | 4.0578490  |
| H | -6.8489313 | -4.5626856 | 2.6779536  |
| H | -2.0922988 | -5.6926210 | 3.8288825  |
| H | -0.8917749 | -4.5745786 | 3.1067826  |
| H | -0.5511685 | -6.1211673 | 1.1914142  |
| H | -0.2384968 | -7.4961218 | 3.9586511  |
| H | 0.8925722  | -6.2885517 | 3.2563904  |
| H | -4.5610689 | -0.8303451 | -0.6307856 |
| H | -4.3253180 | -2.0319766 | -1.9653490 |
| H | -5.4403383 | -0.1475812 | -2.6723460 |
| H | -5.0897195 | 0.9698160  | -4.0073648 |
| H | -4.9663570 | 2.8960860  | -2.3882067 |
| H | -7.0617608 | 2.3760251  | -3.6636609 |
| H | -7.6115421 | 1.2753518  | -2.3494538 |
| H | -1.7814599 | 1.8760153  | -2.6706033 |
| H | -3.1705770 | 2.5007078  | -3.6147028 |
| H | -1.2879935 | 0.2055168  | -4.4605727 |
| H | -0.1606545 | 2.4508451  | -4.4402526 |
| H | -1.4725247 | 3.1376366  | -5.4626012 |
| H | 3.7150806  | -1.8482303 | 0.5332911  |
| H | 3.3462587  | -3.1894619 | 1.6888642  |
| H | 4.8633290  | -0.5433725 | 4.0006347  |
| H | 4.9107487  | -1.5281147 | 2.5303394  |
| H | 6.3785659  | -2.2873976 | 5.1334810  |
| H | 6.3609407  | -3.2117523 | 3.5914549  |
| H | 2.6185128  | -0.0052064 | 5.0064274  |
| H | 1.3616319  | 0.3155216  | 3.7656820  |
| H | 2.6490973  | 2.3711330  | 5.7035678  |
| H | 1.4109720  | 2.8124498  | 4.4728756  |
| H | 2.7195524  | -4.5185785 | -0.4819955 |
| H | 3.1410688  | -2.9883858 | -1.3526351 |
| H | 3.3660978  | -4.7767063 | -2.7817420 |
| H | 2.5403294  | -5.5233906 | -4.1570076 |
| H | 3.9459146  | -7.6495435 | -3.7192199 |

|    |            |            |            |
|----|------------|------------|------------|
| H  | 4.7014668  | -6.7949371 | -2.3296787 |
| H  | -0.7998326 | -4.6022779 | -3.2423377 |
| H  | 0.2337219  | -5.5976854 | -4.3168392 |
| H  | 0.0182449  | -2.5180073 | -4.3120361 |
| H  | -2.0361141 | -3.6967871 | -5.1921487 |
| H  | -1.0184821 | -4.6162829 | -6.3548034 |
| N  | 1.3627730  | 0.7252432  | -1.2339754 |
| O  | 1.5018773  | -0.5684361 | -1.3823342 |
| O  | 2.0765941  | 1.5241119  | -1.7816985 |
| O  | 0.3905773  | 1.0474671  | -0.4459266 |
| H  | 3.8508998  | -3.4566538 | 3.7643336  |
| H  | 4.1905860  | 1.5730941  | 3.8844606  |
| N  | -2.3556764 | 0.0537415  | 1.8982930  |
| O  | -3.1512405 | 0.5847458  | 2.6310393  |
| O  | -1.7516119 | -1.0580377 | 2.1870705  |
| O  | -2.0361655 | 0.5285035  | 0.7304666  |
| Th | -0.4320264 | -1.2708040 | 0.0269283  |
| H  | -7.4490156 | 3.0342983  | -2.0412086 |
| H  | -0.3914032 | 1.8696414  | -6.1232452 |
| H  | -1.1658860 | -2.8372719 | -6.5076274 |
| H  | 3.9109817  | -8.3880646 | -2.0864743 |
| H  | 5.8795784  | -4.0087748 | 5.1265632  |
| H  | 0.6877564  | -7.8965272 | 2.4786869  |
| H  | -6.8464189 | -3.9057155 | 4.3476048  |
| H  | 2.9875702  | 3.6688797  | 4.5132502  |
| C  | 3.6129179  | -2.4874883 | 5.6759799  |
| H  | 4.0586513  | -1.6779529 | 6.2973469  |
| H  | 2.5310136  | -2.2682506 | 5.5393226  |
| H  | 3.6843118  | -3.4278378 | 6.2639370  |
| C  | 2.9405628  | 2.1021314  | 2.2020625  |
| H  | 3.4131682  | 1.3897858  | 1.4878957  |
| H  | 1.8698565  | 2.2140717  | 1.9216343  |
| H  | 3.4334569  | 3.0857552  | 2.0445671  |
| C  | 1.3035353  | -7.6431920 | -2.7209167 |
| H  | 0.3227107  | -7.1923110 | -2.4527190 |
| H  | 1.2975443  | -7.8694558 | -3.8114013 |
| H  | 1.3758182  | -8.6148638 | -2.1863186 |
| C  | 1.4371024  | -3.3997926 | -5.6875569 |
| H  | 1.6171197  | -4.3389806 | -6.2594669 |
| H  | 1.3764025  | -2.5736877 | -6.4290804 |
| H  | 2.3294767  | -3.1982858 | -5.0544195 |
| C  | -2.9060480 | 0.7185517  | -5.8058714 |
| H  | -3.5518027 | 1.5812718  | -6.0875858 |
| H  | -2.3789701 | 0.3914526  | -6.7286991 |
| H  | -3.5654335 | -0.1223904 | -5.4940976 |
| C  | -5.4323553 | 1.7868522  | -0.5961954 |
| H  | -6.0520006 | 0.9240135  | -0.2552264 |
| H  | -4.3861825 | 1.6405509  | -0.2451583 |
| H  | -5.8223224 | 2.6850376  | -0.0701616 |
| C  | -4.1116762 | -4.0699345 | 4.8441387  |
| H  | -4.0510839 | -5.0830733 | 5.3035137  |

|   |            |            |           |
|---|------------|------------|-----------|
| H | -3.0834947 | -3.6549409 | 4.7595359 |
| H | -4.6657340 | -3.4205023 | 5.5557869 |
| C | -1.9892148 | -7.6395263 | 1.7513245 |
| H | -1.4673879 | -8.4684998 | 1.2253776 |
| H | -2.4721287 | -8.0784811 | 2.6537891 |
| H | -2.7912939 | -7.2767020 | 1.0703229 |

**Th(IV)-*n*-Amyl DGA**

|   |            |            |            |
|---|------------|------------|------------|
| C | -6.1259117 | -4.8562082 | 3.8564140  |
| C | -4.7010432 | -4.3702244 | 3.5410494  |
| C | -4.0825985 | -5.1198716 | 2.3480437  |
| N | -2.6870261 | -4.7263137 | 2.0531156  |
| C | -2.3647456 | -3.7744506 | 1.1714929  |
| C | -3.4841841 | -3.0903032 | 0.3752018  |
| O | -2.8591662 | -2.0867951 | -0.4194701 |
| C | -3.7378518 | -1.3308658 | -1.2543739 |
| C | -2.8459395 | -0.3424771 | -2.0178088 |
| N | -3.3948546 | 0.6108677  | -2.7679971 |
| C | -4.8570439 | 0.7912596  | -2.9039493 |
| C | -5.4465893 | 1.8200577  | -1.9236152 |
| C | -6.9529425 | 2.0383376  | -2.1451934 |
| C | -1.6233036 | -5.4046390 | 2.8246446  |
| C | -1.1595983 | -6.7223588 | 2.1823645  |
| C | -0.1315821 | -7.4643325 | 3.0525346  |
| O | -1.1699926 | -3.4143146 | 0.9514198  |
| O | 0.1578640  | -3.0039984 | -1.5777204 |
| C | 1.2012557  | -3.6882871 | -1.7909956 |
| N | 1.3194871  | -4.5141390 | -2.8364701 |
| C | 2.5250443  | -5.3318972 | -3.0941810 |
| C | 2.4475281  | -6.7585540 | -2.5250771 |
| C | 3.6569747  | -7.6154176 | -2.9364684 |
| O | -1.5886113 | -0.4821089 | -1.8955602 |
| O | 1.9096812  | -2.7881689 | 0.2959218  |
| C | 2.9558149  | -2.3387836 | 1.1517359  |
| C | 2.3387621  | -1.3055516 | 2.0959235  |
| N | 3.0263664  | -0.8482567 | 3.1405268  |
| C | 4.3933619  | -1.3058109 | 3.4725528  |
| C | 4.4328608  | -2.4427294 | 4.5070887  |
| C | 5.8710562  | -2.8302259 | 4.8914960  |
| C | 2.3748804  | -3.5416908 | -0.8190306 |
| O | 1.1659894  | -0.8965024 | 1.8245098  |
| C | -2.5231079 | 1.5892024  | -3.4623559 |
| C | -2.1734612 | 1.1831249  | -4.9022355 |
| C | -1.3069785 | 2.2452609  | -5.6003427 |
| C | 2.4246029  | 0.1871388  | 4.0168952  |
| C | 2.7675514  | 1.6207652  | 3.5793483  |
| C | 2.1952393  | 2.6690980  | 4.5489781  |
| C | 0.2152218  | -4.6287939 | -3.8144013 |
| C | 0.4022841  | -3.7320053 | -5.0496391 |

|   |            |            |            |
|---|------------|------------|------------|
| C | -0.7159237 | -3.9341366 | -6.0857441 |
| H | -4.7086033 | -3.2745564 | 3.3330399  |
| H | 2.3731213  | -6.7150589 | -1.4126956 |
| H | -4.0060804 | -3.8251096 | -0.2843016 |
| H | -4.2393711 | -2.6353599 | 1.0575682  |
| H | -4.0695242 | -6.2132775 | 2.5465706  |
| H | -4.7025459 | -4.9897878 | 1.4363917  |
| H | -6.1016963 | -5.9500570 | 4.0758383  |
| H | -6.7685410 | -4.7412005 | 2.9506717  |
| H | -2.0306461 | -5.5885977 | 3.8416449  |
| H | -0.7777562 | -4.6952547 | 2.9254733  |
| H | -0.7252150 | -6.5023558 | 1.1798102  |
| H | -0.5830436 | -7.6862017 | 4.0486290  |
| H | 0.7371847  | -6.7927504 | 3.2560791  |
| H | -4.4947870 | -0.7958511 | -0.6367077 |
| H | -4.2731064 | -2.0119207 | -1.9597487 |
| H | -5.3596449 | -0.1935106 | -2.7962510 |
| H | -5.0404431 | 1.1086851  | -3.9531608 |
| H | -4.9080542 | 2.7879074  | -2.0392949 |
| H | -7.1252240 | 2.3781212  | -3.1940466 |
| H | -7.4910131 | 1.0647710  | -2.0483262 |
| H | -1.6060328 | 1.7109406  | -2.8519250 |
| H | -3.0643549 | 2.5587688  | -3.4504334 |
| H | -1.6360464 | 0.2074248  | -4.8845254 |
| H | -0.3714801 | 2.4028498  | -5.0123545 |
| H | -1.8424676 | 3.2241283  | -5.5909534 |
| H | 3.7656171  | -1.8566295 | 0.5505320  |
| H | 3.3967120  | -3.1980474 | 1.7080837  |
| H | 4.9372279  | -0.4166527 | 3.8575529  |
| H | 4.9197019  | -1.5993382 | 2.5393780  |
| H | 3.8723936  | -2.1303294 | 5.4182913  |
| H | 6.3924667  | -1.9376992 | 5.3111799  |
| H | 6.4402093  | -3.1124176 | 3.9727682  |
| H | 2.7981241  | -0.0114409 | 5.0441988  |
| H | 1.3276915  | 0.0288287  | 4.0184739  |
| H | 2.3672230  | 1.7939494  | 2.5541085  |
| H | 2.5869765  | 2.4764131  | 5.5764552  |
| H | 1.0880186  | 2.5469267  | 4.6145194  |
| H | 2.7542089  | -4.5334309 | -0.4811744 |
| H | 3.2072098  | -2.9977736 | -1.3281143 |
| H | 3.4215102  | -4.7989402 | -2.7131503 |
| H | 2.6492846  | -5.3695237 | -4.1972737 |
| H | 3.7035323  | -7.6705604 | -4.0496531 |
| H | 4.5998245  | -7.1098518 | -2.6169046 |
| H | -0.7260226 | -4.3769499 | -3.2863139 |
| H | 0.1603283  | -5.6978020 | -4.1138073 |
| H | 0.4361402  | -2.6670791 | -4.7243125 |
| H | -1.7030537 | -3.7029773 | -5.6169216 |
| H | -0.7615100 | -5.0109563 | -6.3755867 |
| N | 1.4610676  | 0.7351024  | -1.1547462 |
| O | 1.5878213  | -0.5569538 | -1.3254237 |

|    |            |             |            |
|----|------------|-------------|------------|
| O  | 2.2010950  | 1.5352659   | -1.6630689 |
| O  | 0.4696566  | 1.0538616   | -0.3878005 |
| H  | 3.8954674  | -3.3329924  | 4.1024033  |
| H  | -5.2566408 | 1.4906638   | -0.8751734 |
| H  | -3.1103011 | 1.0234849   | -5.4861044 |
| H  | -4.0525501 | -4.5058013  | 4.4365775  |
| H  | -2.0396690 | -7.3842308  | 2.0074367  |
| H  | 1.5089899  | -7.2444202  | -2.8788303 |
| H  | 3.8745006  | 1.7382721   | 3.5166249  |
| H  | 1.3868065  | -3.9494799  | -5.5256052 |
| C  | -6.7754797 | -4.1145217  | 5.0372548  |
| H  | -6.1297238 | -4.2283485  | 5.9389350  |
| H  | -6.7990492 | -3.0215714  | 4.8149573  |
| C  | 0.3720263  | -8.7743889  | 2.4229947  |
| H  | 0.8310570  | -8.5512864  | 1.4301561  |
| H  | -0.4998341 | -9.4367591  | 2.2116146  |
| C  | -7.5676955 | 3.0590629   | -1.1720534 |
| H  | -7.0224534 | 4.0270048   | -1.2668768 |
| H  | -7.3972057 | 2.7150760   | -0.1245989 |
| C  | -0.9437143 | 1.8816262   | -7.0498680 |
| H  | -0.4223543 | 0.8946935   | -7.0594802 |
| H  | -1.8814083 | 1.7381279   | -7.6366879 |
| C  | -0.5375779 | -3.0783481  | -7.3515940 |
| H  | -0.4820634 | -2.0017809  | -7.0628857 |
| H  | 0.4466827  | -3.3187079  | -7.8176689 |
| C  | 3.6214386  | -9.0403809  | -2.3585750 |
| H  | 2.6680952  | -9.5336970  | -2.6623596 |
| H  | 3.5948171  | -8.9828950  | -1.2446269 |
| N  | -2.3361714 | 0.0546388   | 1.8714987  |
| O  | -3.1520965 | 0.5778584   | 2.5873735  |
| O  | -1.7159179 | -1.0427057  | 2.1811528  |
| O  | -2.0106381 | 0.5232565   | 0.7028934  |
| Th | -0.3801947 | -1.2613898  | 0.0363794  |
| C  | -9.0665418 | 3.2873370   | -1.4036928 |
| H  | -9.4752073 | 4.0268075   | -0.6817203 |
| H  | -9.2654017 | 3.6752508   | -2.4277289 |
| H  | -9.6464448 | 2.3449587   | -1.2831215 |
| C  | -0.0650359 | 2.9356524   | -7.7350936 |
| H  | 0.1783358  | 2.6401719   | -8.7785725 |
| H  | -0.5755483 | 3.9236753   | -7.7783551 |
| H  | 0.8970123  | 3.0787478   | -7.1934388 |
| C  | -1.6551800 | -3.2799570  | -8.3822643 |
| H  | -1.4879522 | -2.6536998  | -9.2850260 |
| H  | -1.7120532 | -4.3396259  | -8.7177909 |
| H  | -2.6506505 | -3.0067816  | -7.9646441 |
| C  | 4.8103031  | -9.9017459  | -2.8024631 |
| H  | 4.7544037  | -10.9202167 | -2.3616545 |
| H  | 4.8367039  | -10.0176208 | -3.9088886 |
| H  | 5.7792822  | -9.4532166  | -2.4880228 |
| C  | 5.9396345  | -3.9841735  | 5.9064797  |
| H  | 5.3681396  | -3.7000489  | 6.8213333  |



|   |            |             |           |
|---|------------|-------------|-----------|
| H | 5.4168992  | -4.8747494  | 5.4832706 |
| C | 2.5254072  | 4.1160208   | 4.1430129 |
| H | 3.6325143  | 4.2323735   | 4.0750868 |
| H | 2.1344274  | 4.3063945   | 3.1159283 |
| C | 7.3744561  | -4.3640606  | 6.2928919 |
| H | 7.9085524  | -3.5091156  | 6.7641910 |
| H | 7.3843801  | -5.2050376  | 7.0193080 |
| H | 7.9658991  | -4.6816731  | 5.4046972 |
| C | 1.3813683  | -9.5219528  | 3.3033856 |
| H | 1.7241288  | -10.4602303 | 2.8162224 |
| H | 2.2828450  | -8.9013988  | 3.5092346 |
| H | 0.9361226  | -9.8005963  | 4.2844763 |
| C | -8.1930311 | -4.6079257  | 5.3526661 |
| H | -8.1971569 | -5.6874491  | 5.6232917 |
| H | -8.6312749 | -4.0482602  | 6.2068076 |
| H | -8.8740005 | -4.4767550  | 4.4818140 |
| C | 1.9573218  | 5.1593113   | 5.1132718 |
| H | 2.3585553  | 5.0198734   | 6.1422639 |
| H | 2.2181089  | 6.1903855   | 4.7907332 |
| H | 0.8475848  | 5.0973594   | 5.1740920 |

#### **Th(IV)-*iso*-Amyl DGA**

|   |            |            |            |
|---|------------|------------|------------|
| C | -6.2112587 | -4.7531882 | 3.7505466  |
| C | -4.7405766 | -4.3627248 | 3.4666970  |
| C | -4.1018823 | -5.1372832 | 2.2997519  |
| N | -2.7026252 | -4.7404647 | 2.0272308  |
| C | -2.3678872 | -3.8023259 | 1.1360606  |
| C | -3.4768203 | -3.1385857 | 0.3084642  |
| O | -2.8473749 | -2.1322304 | -0.4789764 |
| C | -3.7204564 | -1.3845906 | -1.3275946 |
| C | -2.8286309 | -0.3771811 | -2.0657418 |
| N | -3.3788425 | 0.5921083  | -2.7933130 |
| C | -4.8416416 | 0.7671020  | -2.9318291 |
| C | -5.4340447 | 1.7611413  | -1.9170782 |
| C | -6.9626190 | 1.9642523  | -2.0541112 |
| C | -1.6542692 | -5.4003580 | 2.8349678  |
| C | -1.1808496 | -6.7295135 | 2.2225957  |
| C | -0.1347136 | -7.4800877 | 3.0813787  |
| O | -1.1711520 | -3.4388822 | 0.9312587  |
| O | 0.1740311  | -3.0525918 | -1.5933427 |
| C | 1.2269715  | -3.7242468 | -1.8030354 |
| N | 1.3511399  | -4.5658972 | -2.8347045 |
| C | 2.5743993  | -5.3555924 | -3.0978363 |
| C | 2.5402244  | -6.7713374 | -2.4978307 |
| C | 3.7802553  | -7.6302285 | -2.8494795 |
| O | -1.5709150 | -0.5178498 | -1.9430662 |
| O | 1.9270962  | -2.8004682 | 0.2756395  |
| C | 2.9663981  | -2.3305292 | 1.1287292  |
| C | 2.3340305  | -1.3001152 | 2.0653440  |

|   |            |            |            |
|---|------------|------------|------------|
| N | 3.0152641  | -0.8204281 | 3.1037474  |
| C | 4.3888773  | -1.2525020 | 3.4422237  |
| C | 4.4332013  | -2.3810868 | 4.4863551  |
| C | 5.8656503  | -2.8031469 | 4.8955805  |
| C | 2.4043585  | -3.5435992 | -0.8414582 |
| O | 1.1543878  | -0.9120441 | 1.7914557  |
| C | -2.5149661 | 1.6005608  | -3.4534088 |
| C | -2.1786758 | 1.2485322  | -4.9109513 |
| C | -1.3012101 | 2.3105046  | -5.6174501 |
| C | 2.3995523  | 0.2209377  | 3.9636729  |
| C | 2.7281695  | 1.6467307  | 3.4885130  |
| C | 2.2441795  | 2.7540537  | 4.4556092  |
| C | 0.2373200  | -4.7287818 | -3.7949581 |
| C | 0.3879774  | -3.8438636 | -5.0443967 |
| C | -0.7507119 | -4.0198676 | -6.0776970 |
| H | -4.6854213 | -3.2701697 | 3.2504056  |
| H | 2.4510525  | -6.6924540 | -1.3887334 |
| H | -3.9736591 | -3.8852679 | -0.3572508 |
| H | -4.2540111 | -2.6882931 | 0.9687047  |
| H | -4.0823467 | -6.2264433 | 2.5121468  |
| H | -4.7046630 | -5.0223503 | 1.3745259  |
| H | -6.7849550 | -4.6134905 | 2.8015830  |
| H | -2.0855764 | -5.5552744 | 3.8453934  |
| H | -0.8095093 | -4.6897431 | 2.9338853  |
| H | -0.7496133 | -6.5157650 | 1.2174906  |
| H | 0.7016783  | -6.7682804 | 3.2882076  |
| H | -4.4984484 | -0.8672889 | -0.7215296 |
| H | -4.2299187 | -2.0691419 | -2.0487809 |
| H | -5.3388370 | -0.2233171 | -2.8539541 |
| H | -5.0157231 | 1.1114662  | -3.9725216 |
| H | -4.9239973 | 2.7461699  | -2.0265719 |
| H | -7.4459201 | 0.9594819  | -1.9745941 |
| H | -1.5922751 | 1.6979365  | -2.8472803 |
| H | -3.0624905 | 2.5630506  | -3.3910596 |
| H | -1.6486955 | 0.2688788  | -4.9234124 |
| H | -0.3792359 | 2.4459361  | -5.0015676 |
| H | 3.7690712  | -1.8401481 | 0.5247140  |
| H | 3.4200631  | -3.1795164 | 1.6905578  |
| H | 4.9137448  | -0.3485064 | 3.8150750  |
| H | 4.9206670  | -1.5511482 | 2.5135984  |
| H | 3.8709520  | -2.0640363 | 5.3960285  |
| H | 6.4258337  | -3.0493377 | 3.9598921  |
| H | 2.7836785  | 0.0502791  | 4.9923089  |
| H | 1.3076227  | 0.0395841  | 3.9719348  |
| H | 2.2762102  | 1.8082370  | 2.4818166  |
| H | 2.7062314  | 2.5518983  | 5.4527069  |
| H | 2.8129339  | -4.5237218 | -0.5041116 |
| H | 3.2170666  | -2.9777921 | -1.3584131 |
| H | 3.4612774  | -4.7932226 | -2.7369602 |
| H | 2.6795231  | -5.4023334 | -4.2011436 |
| H | 4.6881667  | -7.0429353 | -2.5674982 |

|    |            |            |            |
|----|------------|------------|------------|
| H  | -0.7032185 | -4.4899659 | -3.2593435 |
| H  | 0.2114553  | -5.8046761 | -4.0665725 |
| H  | 0.4283395  | -2.7796351 | -4.7182592 |
| H  | -1.7153886 | -3.8166393 | -5.5507532 |
| N  | 1.4630243  | 0.7047626  | -1.1902936 |
| O  | 1.5900307  | -0.5872441 | -1.3607105 |
| O  | 2.2054513  | 1.5045683  | -1.6962371 |
| O  | 0.4699207  | 1.0242168  | -0.4264368 |
| H  | 3.8919478  | -3.2677475 | 4.0796607  |
| H  | -5.1977477 | 1.4109102  | -0.8851271 |
| H  | -4.1354407 | -4.5218184 | 4.3893721  |
| H  | -2.0569146 | -7.4004796 | 2.0561749  |
| H  | 1.6207830  | -7.2983704 | -2.8458617 |
| H  | 3.8320608  | 1.7405118  | 3.3640589  |
| H  | 1.3618897  | -4.0608478 | -5.5441098 |
| C  | -6.8102403 | -3.8037031 | 4.8036704  |
| H  | -7.8822358 | -4.0369940 | 4.9828306  |
| H  | -6.2794974 | -3.8996169 | 5.7781249  |
| H  | -6.7450467 | -2.7392929 | 4.4857690  |
| C  | 0.4429140  | -8.6672513 | 2.2893443  |
| H  | 0.9038590  | -8.3382655 | 1.3306470  |
| H  | 1.2240278  | -9.1969103 | 2.8769675  |
| H  | -0.3502779 | -9.4100946 | 2.0455248  |
| C  | -7.4795344 | 2.8263459  | -0.8884086 |
| H  | -7.0291739 | 3.8444493  | -0.9134635 |
| H  | -8.5829418 | 2.9474871  | -0.9441534 |
| H  | -7.2382523 | 2.3738533  | 0.0992988  |
| C  | -0.8687749 | 1.7965937  | -7.0023789 |
| H  | -0.1967666 | 2.5258260  | -7.5048862 |
| H  | -0.3218857 | 0.8294971  | -6.9313964 |
| H  | -1.7497487 | 1.6417752  | -7.6665049 |
| C  | -0.6019783 | -2.9803569 | -7.2028060 |
| H  | -0.5933424 | -1.9404941 | -6.8058528 |
| H  | 0.3451602  | -3.1346361 | -7.7677293 |
| H  | -1.4389819 | -3.0586323 | -7.9304646 |
| C  | 3.7793556  | -8.9216889 | -2.0114416 |
| H  | 2.8860947  | -9.5465316 | -2.2395112 |
| H  | 4.6797032  | -9.5360512 | -2.2280750 |
| H  | 3.7744434  | -8.7051112 | -0.9196394 |
| N  | -2.3576642 | 0.0294657  | 1.8078431  |
| O  | -3.1841830 | 0.5539758  | 2.5109464  |
| O  | -1.7327234 | -1.0598640 | 2.1336872  |
| O  | -2.0252806 | 0.4888744  | 0.6374541  |
| Th | -0.3791180 | -1.2943295 | -0.0007906 |
| C  | 5.8086922  | -4.0783556 | 5.7559085  |
| H  | 6.8309212  | -4.4177592 | 6.0300986  |
| H  | 5.2514279  | -3.8986546 | 6.7035813  |
| H  | 5.3079946  | -4.9160626 | 5.2204794  |
| C  | 2.7515325  | 4.1260854  | 3.9761327  |
| H  | 2.3218993  | 4.3889802  | 2.9826336  |
| H  | 2.4606661  | 4.9272463  | 4.6897560  |

|   |            |            |            |
|---|------------|------------|------------|
| H | 3.8601359  | 4.1450156  | 3.8832700  |
| C | -0.7016889 | -7.9518694 | 4.4332717  |
| H | -1.5559851 | -8.6512260 | 4.2851605  |
| H | 0.0733502  | -8.4960890 | 5.0155459  |
| H | -1.0534068 | -7.1123095 | 5.0733579  |
| C | -6.3636152 | -6.2224185 | 4.1850914  |
| H | -6.0289327 | -6.9441889 | 3.4065469  |
| H | -5.7848320 | -6.4264951 | 5.1151710  |
| H | -7.4283086 | -6.4574538 | 4.4011917  |
| C | -7.3601527 | 2.5766123  | -3.4097473 |
| H | -6.8748560 | 3.5686846  | -3.5580556 |
| H | -7.0918978 | 1.9299701  | -4.2749140 |
| H | -8.4590296 | 2.7362600  | -3.4590312 |
| C | -0.8181987 | -5.4450723 | -6.6575125 |
| H | 0.1361898  | -5.7162660 | -7.1646766 |
| H | -1.0281129 | -6.2189702 | -5.8859505 |
| H | -1.6269334 | -5.5221298 | -7.4166665 |
| C | 3.8697331  | -7.9518319 | -4.3525439 |
| H | 2.9773982  | -8.5262815 | -4.6921158 |
| H | 3.9551192  | -7.0422876 | -4.9877411 |
| H | 4.7645695  | -8.5755628 | -4.5657661 |
| H | -3.1214957 | 1.1124288  | -5.4929433 |
| C | -1.9997054 | 3.6779243  | -5.7367498 |
| H | -1.3511983 | 4.4019679  | -6.2760870 |
| H | -2.9511532 | 3.5945159  | -6.3110527 |
| H | -2.2326781 | 4.1335582  | -4.7485310 |
| C | 0.7148608  | 2.7617694  | 4.6336573  |
| H | 0.1989462  | 2.9229418  | 3.6588754  |
| H | 0.3266903  | 1.8168426  | 5.0754529  |
| H | 0.4052793  | 3.5852130  | 5.3133827  |
| C | 6.6272050  | -1.6817237 | 5.6261068  |
| H | 6.7639221  | -0.7704064 | 5.0022875  |
| H | 6.1000789  | -1.3828426 | 6.5611451  |
| H | 7.6436649  | -2.0253207 | 5.9158734  |

### **Np(IV)-*n*-Butyl DGA**

|   |            |            |            |
|---|------------|------------|------------|
| C | -6.1173837 | -4.9165852 | 3.7502935  |
| C | -4.6966196 | -4.3768822 | 3.5070813  |
| C | -3.9959829 | -5.0909773 | 2.3381129  |
| N | -2.6035526 | -4.6449194 | 2.1114841  |
| C | -2.2742490 | -3.6828183 | 1.2423837  |
| C | -3.3751489 | -3.0376227 | 0.3922407  |
| O | -2.7438957 | -2.0162257 | -0.3717133 |
| C | -3.5897229 | -1.2997739 | -1.2713863 |
| C | -2.6741375 | -0.3145480 | -2.0110240 |
| N | -3.2043019 | 0.6214664  | -2.7999536 |
| C | -4.6591956 | 0.7638936  | -3.0215828 |
| C | -5.3325110 | 1.7899422  | -2.0934212 |
| C | -6.8320221 | 1.9541816  | -2.3993667 |

|   |            |            |            |
|---|------------|------------|------------|
| C | -1.5540893 | -5.2848429 | 2.9337375  |
| C | -1.0419116 | -6.6074391 | 2.3395736  |
| C | -0.0278368 | -7.3066787 | 3.2616392  |
| O | -1.0821488 | -3.2850469 | 1.0790584  |
| O | -0.0040198 | -2.9081047 | -1.5254274 |
| C | 1.0142306  | -3.6182063 | -1.7647253 |
| N | 1.0867504  | -4.4399682 | -2.8209202 |
| C | 2.2751622  | -5.2646510 | -3.1288541 |
| C | 2.2067360  | -6.7009317 | -2.5831286 |
| C | 3.4185265  | -7.5445188 | -3.0182432 |
| O | -1.4236069 | -0.4334430 | -1.8392313 |
| O | 1.8032124  | -2.7873788 | 0.3225057  |
| C | 2.8911349  | -2.3289314 | 1.1187351  |
| C | 2.3256509  | -1.2861025 | 2.0805417  |
| N | 3.0503275  | -0.8397876 | 3.1048631  |
| C | 4.4249947  | -1.3059807 | 3.3888561  |
| C | 4.4974041  | -2.4304082 | 4.4354185  |
| C | 5.9481687  | -2.8233722 | 4.7676941  |
| C | 2.2184137  | -3.5156990 | -0.8269044 |
| O | 1.1522348  | -0.8506459 | 1.8499080  |
| C | -2.3163819 | 1.6138564  | -3.4503505 |
| C | -1.8679546 | 1.2086013  | -4.8629808 |
| C | -0.9915405 | 2.2916383  | -5.5169894 |
| C | 2.4838563  | 0.1950966  | 4.0053272  |
| C | 2.7886036  | 1.6308641  | 3.5476817  |
| C | 2.2665914  | 2.6747864  | 4.5515308  |
| C | -0.0466204 | -4.5283006 | -3.7659158 |
| C | 0.0999645  | -3.5978244 | -4.9815173 |
| C | -1.0347825 | -3.7927731 | -6.0021334 |
| H | -4.7346035 | -3.2797067 | 3.3095602  |
| H | 2.1415370  | -6.6769623 | -1.4693168 |
| H | -3.8387933 | -3.7906178 | -0.2901788 |
| H | -4.1797311 | -2.6079399 | 1.0338669  |
| H | -3.9529433 | -6.1850807 | 2.5286209  |
| H | -4.5775538 | -4.9746436 | 1.3996547  |
| H | -6.0638191 | -6.0137049 | 3.9422769  |
| H | -6.7218881 | -4.7987261 | 2.8202127  |
| H | -1.9921318 | -5.4550145 | 3.9405327  |
| H | -0.7271155 | -4.5558108 | 3.0467026  |
| H | -0.5788082 | -6.4044291 | 1.3459660  |
| H | -0.5018368 | -7.4907729 | 4.2539510  |
| H | 0.8281812  | -6.6183342 | 3.4574834  |
| H | -4.3903346 | -0.7662272 | -0.7106718 |
| H | -4.0702753 | -2.0103996 | -1.9870486 |
| H | -5.1433387 | -0.2316773 | -2.9284948 |
| H | -4.7906532 | 1.0621634  | -4.0843610 |
| H | -4.8200493 | 2.7732410  | -2.1986001 |
| H | -6.9560767 | 2.2602773  | -3.4643929 |
| H | -7.3404931 | 0.9654206  | -2.3052902 |
| H | -1.4414620 | 1.7620640  | -2.7862066 |
| H | -2.8796995 | 2.5705878  | -3.4802158 |

|   |            |            |            |
|---|------------|------------|------------|
| H | -1.3038483 | 0.2491930  | -4.8040698 |
| H | -0.1050365 | 2.4856277  | -4.8687201 |
| H | -1.5595261 | 3.2503996  | -5.5521031 |
| H | 3.6685779  | -1.8499218 | 0.4736426  |
| H | 3.3608265  | -3.1824076 | 1.6598692  |
| H | 4.9906433  | -0.4165585 | 3.7415613  |
| H | 4.9111724  | -1.6147020 | 2.4392823  |
| H | 3.9770095  | -2.1027724 | 5.3649295  |
| H | 6.4923017  | -1.9255179 | 5.1427468  |
| H | 6.4724090  | -3.1301374 | 3.8316251  |
| H | 2.9111823  | 0.0043525  | 5.0128461  |
| H | 1.3898463  | 0.0266987  | 4.0633473  |
| H | 2.3238644  | 1.8005035  | 2.5492812  |
| H | 2.7368487  | 2.4940457  | 5.5467736  |
| H | 1.1710383  | 2.5273173  | 4.6978944  |
| H | 2.5926707  | -4.5214928 | -0.5282196 |
| H | 3.0425948  | -2.9716339 | -1.3489428 |
| H | 3.1881754  | -4.7464846 | -2.7672060 |
| H | 2.3661048  | -5.2840232 | -4.2359615 |
| H | 3.4641287  | -7.5670768 | -4.1317926 |
| H | 4.3573139  | -7.0422043 | -2.6850168 |
| H | -0.9710711 | -4.2915772 | -3.2022299 |
| H | -0.1110237 | -5.5887026 | -4.0930408 |
| H | 0.1209058  | -2.5412718 | -4.6283295 |
| H | -2.0158238 | -3.6126244 | -5.5014189 |
| H | -1.0531063 | -4.8577616 | -6.3320695 |
| N | 1.4472375  | 0.7411811  | -1.0190161 |
| O | 1.6052426  | -0.5530487 | -1.1142539 |
| O | 2.1953159  | 1.5330625  | -1.5291636 |
| O | 0.4117155  | 1.0638207  | -0.3210631 |
| H | 3.9383731  | -3.3220287 | 4.0640885  |
| H | -5.1899583 | 1.4854285  | -1.0298290 |
| H | -2.7617572 | 1.0165367  | -5.5023748 |
| H | -4.0877542 | -4.4996968 | 4.4318065  |
| H | -1.9009233 | -7.2934477 | 2.1530857  |
| H | 1.2677676  | -7.1857919 | -2.9374773 |
| H | 3.8886434  | 1.7583982  | 3.4174091  |
| H | 1.0786909  | -3.7849380 | -5.4818321 |
| C | -6.8294993 | -4.2243368 | 4.9192647  |
| H | -7.8508027 | -4.6379002 | 5.0616063  |
| H | -6.2752731 | -4.3648338 | 5.8736791  |
| H | -6.9315919 | -3.1297388 | 4.7459234  |
| C | 0.4923141  | -8.6325548 | 2.6915328  |
| H | 1.0100293  | -8.4855728 | 1.7166166  |
| H | 1.2154742  | -9.1100272 | 3.3870887  |
| H | -0.3364097 | -9.3561846 | 2.5252445  |
| C | -7.5204473 | 2.9771259  | -1.4867564 |
| H | -7.0630018 | 3.9860992  | -1.5896560 |
| H | -8.5981909 | 3.0711243  | -1.7393430 |
| H | -7.4503161 | 2.6823369  | -0.4158732 |
| C | -0.5272333 | 1.9205539  | -6.9308448 |

|    |            |            |            |
|----|------------|------------|------------|
| H  | 0.1030930  | 2.7252545  | -7.3664470 |
| H  | 0.0773019  | 0.9857375  | -6.9298531 |
| H  | -1.3902848 | 1.7650508  | -7.6161142 |
| C  | -0.9038346 | -2.8804149 | -7.2284673 |
| H  | -0.9153334 | -1.8049132 | -6.9411983 |
| H  | 0.0453265  | -3.0707678 | -7.7770376 |
| H  | -1.7393094 | -3.0477848 | -7.9414927 |
| C  | 3.3813380  | -8.9789298 | -2.4767969 |
| H  | 2.4732416  | -9.5215581 | -2.8223458 |
| H  | 4.2657461  | -9.5557412 | -2.8222904 |
| H  | 3.3843078  | -8.9970652 | -1.3637323 |
| N  | -2.3045183 | 0.1418224  | 1.8461225  |
| O  | -3.1229565 | 0.6693169  | 2.5553008  |
| O  | -1.6358967 | -0.9186183 | 2.1981388  |
| O  | -2.0146491 | 0.5510230  | 0.6542047  |
| Np | -0.3683847 | -1.2054137 | 0.1311880  |
| C  | 6.0413540  | -3.9502935 | 5.8040461  |
| H  | 7.1012332  | -4.2031788 | 6.0202352  |
| H  | 5.5648234  | -3.6587236 | 6.7664617  |
| H  | 5.5421598  | -4.8785008 | 5.4454669  |
| C  | 2.5379148  | 4.1185022  | 4.1096653  |
| H  | 2.0420315  | 4.3487394  | 3.1402417  |
| H  | 2.1556094  | 4.8413176  | 4.8619500  |
| H  | 3.6273043  | 4.3090629  | 3.9862314  |

### **Np(IV)-*iso*-Butyl DGA**

|   |            |            |            |
|---|------------|------------|------------|
| C | -6.2099757 | -4.6210612 | 3.6699396  |
| C | -4.7676830 | -4.1080092 | 3.5031661  |
| C | -4.0375274 | -5.0239071 | 2.4882963  |
| N | -2.6364514 | -4.6534851 | 2.1779526  |
| C | -2.3216121 | -3.7389570 | 1.2524611  |
| C | -3.4359568 | -3.1147039 | 0.4062273  |
| O | -2.8174977 | -2.1108433 | -0.3922481 |
| C | -3.6937694 | -1.3879461 | -1.2593777 |
| C | -2.8044647 | -0.3829365 | -2.0020178 |
| N | -3.3415004 | 0.5614217  | -2.7767829 |
| C | -4.7967282 | 0.7172672  | -2.9957786 |
| C | -5.4575275 | 1.8879025  | -2.2276014 |
| C | -6.9028611 | 2.0526044  | -2.7318804 |
| C | -1.5439273 | -5.2856647 | 2.9524854  |
| C | -0.8653013 | -6.4853373 | 2.2507429  |
| C | 0.2921997  | -6.9805182 | 3.1365016  |
| O | -1.1274526 | -3.3785184 | 1.0250979  |
| O | -0.0339044 | -2.9712574 | -1.5674985 |
| C | 1.0009817  | -3.6631140 | -1.7918564 |
| N | 1.1044174  | -4.4757196 | -2.8536652 |
| C | 2.3067477  | -5.3021391 | -3.1105383 |
| C | 2.3328697  | -6.6921816 | -2.4283071 |
| C | 3.6819636  | -7.3650578 | -2.7414674 |

|   |            |            |            |
|---|------------|------------|------------|
| O | -1.5493209 | -0.4919326 | -1.8457903 |
| O | 1.7494318  | -2.8041965 | 0.2999295  |
| C | 2.8190571  | -2.3343397 | 1.1149677  |
| C | 2.2278946  | -1.2983220 | 2.0680955  |
| N | 2.9276753  | -0.8573928 | 3.1150443  |
| C | 4.2715271  | -1.3833182 | 3.4505513  |
| C | 4.3031941  | -2.6726691 | 4.3100366  |
| C | 5.7744198  | -3.0776896 | 4.5179491  |
| C | 2.1908104  | -3.5332277 | -0.8395720 |
| O | 1.0666802  | -0.8578951 | 1.7915803  |
| C | -2.4340935 | 1.5485624  | -3.4159345 |
| C | -1.7235634 | 1.0594473  | -4.6987424 |
| C | -0.7433025 | 2.1547181  | -5.1569836 |
| C | 2.3839391  | 0.2375328  | 3.9573124  |
| C | 3.0168086  | 1.6245453  | 3.6924239  |
| C | 2.4006211  | 2.6321207  | 4.6806274  |
| C | -0.0091715 | -4.5231072 | -3.8291160 |
| C | -0.0204863 | -3.3673707 | -4.8572842 |
| C | -1.2463618 | -3.5413470 | -5.7718026 |
| H | -4.8164362 | -3.0809542 | 3.0682543  |
| H | 2.2771507  | -6.5315789 | -1.3244992 |
| H | -3.9064320 | -3.8878105 | -0.2491855 |
| H | -4.2333367 | -2.6693312 | 1.0440335  |
| H | -4.0105555 | -6.0616425 | 2.8800789  |
| H | -4.6134633 | -5.0740785 | 1.5391196  |
| H | -6.2251173 | -5.6389665 | 4.1208949  |
| H | -6.7534895 | -4.6704576 | 2.7000889  |
| H | -1.9794142 | -5.6086188 | 3.9198525  |
| H | -0.7910809 | -4.4991382 | 3.1642182  |
| H | -0.4341567 | -6.1036545 | 1.2959264  |
| H | -0.0820181 | -7.3608975 | 4.1138450  |
| H | 1.0287164  | -6.1731262 | 3.3479924  |
| H | -4.4812787 | -0.8704760 | -0.6683184 |
| H | -4.1860777 | -2.0910739 | -1.9741993 |
| H | -5.3072992 | -0.2388065 | -2.7503443 |
| H | -4.9346762 | 0.8683002  | -4.0873272 |
| H | -4.8994298 | 2.8164384  | -2.4911733 |
| H | -6.9417674 | 2.2399205  | -3.8276388 |
| H | -7.5138875 | 1.1461661  | -2.5173575 |
| H | -1.6804821 | 1.8394647  | -2.6555995 |
| H | -3.0501014 | 2.4440660  | -3.6414348 |
| H | -1.1275431 | 0.1593817  | -4.4211228 |
| H | -0.0014560 | 2.4019431  | -4.3660541 |
| H | -1.2807171 | 3.0922854  | -5.4267773 |
| H | 3.5977616  | -1.8377722 | 0.4840543  |
| H | 3.2951575  | -3.1838846 | 1.6537558  |
| H | 4.7975902  | -0.5678719 | 3.9896306  |
| H | 4.8417337  | -1.5377868 | 2.5089517  |
| H | 6.3229030  | -2.3082522 | 5.1064660  |
| H | 6.3121991  | -3.2138414 | 3.5532344  |
| H | 2.5551688  | -0.0563952 | 5.0135485  |



|    |            |            |            |
|----|------------|------------|------------|
| H  | 1.2900043  | 0.2722758  | 3.7832632  |
| H  | 2.5405968  | 2.3151145  | 5.7378423  |
| H  | 1.3088768  | 2.7570422  | 4.5011128  |
| H  | 2.5835389  | -4.5274670 | -0.5290335 |
| H  | 3.0088699  | -2.9760889 | -1.3579766 |
| H  | 3.2096086  | -4.7209383 | -2.8242068 |
| H  | 2.3715593  | -5.4310384 | -4.2104032 |
| H  | 3.7930544  | -7.5546689 | -3.8329137 |
| H  | 4.5456948  | -6.7433090 | -2.4161894 |
| H  | -0.9578714 | -4.5198228 | -3.2533526 |
| H  | 0.0650867  | -5.4980409 | -4.3531876 |
| H  | -0.1451974 | -2.4201304 | -4.2832200 |
| H  | -2.1954884 | -3.5888292 | -5.1919800 |
| H  | -1.1721510 | -4.4740499 | -6.3756413 |
| N  | 1.3125583  | 0.6941293  | -1.1162421 |
| O  | 1.4861471  | -0.5989947 | -1.2082427 |
| O  | 2.0329570  | 1.4921479  | -1.6576457 |
| O  | 0.2970966  | 1.0071509  | -0.3886070 |
| H  | 3.8034759  | -3.4852916 | 3.7284122  |
| H  | 4.1067140  | 1.5548551  | 3.9218059  |
| N  | -2.3500771 | 0.0205803  | 1.8827040  |
| O  | -3.1504255 | 0.5478136  | 2.6132041  |
| O  | -1.7106464 | -1.0666014 | 2.1902429  |
| O  | -2.0536070 | 0.4685875  | 0.7034847  |
| Np | -0.4452846 | -1.2794053 | 0.0822196  |
| H  | -7.3944268 | 2.9117421  | -2.2277542 |
| H  | -0.1804693 | 1.8254270  | -6.0571059 |
| H  | -1.3286017 | -2.6925214 | -6.4847898 |
| H  | 3.7595150  | -8.3454977 | -2.2247886 |
| H  | 5.8404468  | -4.0341268 | 5.0791138  |
| H  | 0.8353489  | -7.8162951 | 2.6444954  |
| H  | -6.7858737 | -3.9510472 | 4.3434021  |
| H  | 2.8758129  | 3.6297302  | 4.5653219  |
| C  | 3.5617650  | -2.5369060 | 5.6503972  |
| H  | 4.0007094  | -1.7284929 | 6.2780324  |
| H  | 2.4772767  | -2.3278464 | 5.5183700  |
| H  | 3.6445576  | -3.4815980 | 6.2298543  |
| C  | 2.8631204  | 2.0876194  | 2.2359991  |
| H  | 3.3554175  | 1.3918877  | 1.5187714  |
| H  | 1.7930427  | 2.1848969  | 1.9475537  |
| H  | 3.3402683  | 3.0813644  | 2.0943471  |
| C  | 1.1497456  | -7.5888536 | -2.8292395 |
| H  | 0.1684920  | -7.1493868 | -2.5443810 |
| H  | 1.1406501  | -7.7826774 | -3.9259543 |
| H  | 1.2271019  | -8.5757886 | -2.3240331 |
| C  | 1.2773551  | -3.2693855 | -5.6756769 |
| H  | 1.4620515  | -4.1968491 | -6.2649590 |
| H  | 1.2150858  | -2.4298931 | -6.4018857 |
| H  | 2.1677563  | -3.0768843 | -5.0369448 |
| C  | -2.7001339 | 0.6694442  | -5.8206216 |
| H  | -3.3393895 | 1.5304254  | -6.1216520 |

|   |            |            |            |
|---|------------|------------|------------|
| H | -2.1423248 | 0.3459328  | -6.7265249 |
| H | -3.3658679 | -0.1743441 | -5.5315893 |
| C | -5.4041986 | 1.7213779  | -0.7008723 |
| H | -6.0217329 | 0.8533842  | -0.3692753 |
| H | -4.3679690 | 1.5949050  | -0.3142382 |
| H | -5.8244926 | 2.6199575  | -0.1995483 |
| C | -4.0461844 | -3.9981018 | 4.8563653  |
| H | -3.9515265 | -4.9922912 | 5.3500491  |
| H | -3.0328736 | -3.5502219 | 4.7592749  |
| H | -4.6249504 | -3.3450023 | 5.5445782  |
| C | -1.8415535 | -7.6265961 | 1.9185652  |
| H | -1.3062439 | -8.4666509 | 1.4247893  |
| H | -2.3154885 | -8.0379644 | 2.8387625  |
| H | -2.6504086 | -7.3051062 | 1.2252916  |

### **Np(IV)-*n*-Amyl DGA**

|   |            |            |            |
|---|------------|------------|------------|
| C | -6.1134866 | -4.9621806 | 3.7355650  |
| C | -4.7081212 | -4.3909603 | 3.4812687  |
| C | -3.9840867 | -5.1211653 | 2.3368037  |
| N | -2.5938512 | -4.6640544 | 2.1177052  |
| C | -2.2658433 | -3.7093937 | 1.2403870  |
| C | -3.3659984 | -3.0808802 | 0.3768512  |
| O | -2.7395814 | -2.0558028 | -0.3859277 |
| C | -3.5872032 | -1.3440647 | -1.2877177 |
| C | -2.6744573 | -0.3564302 | -2.0278020 |
| N | -3.2072835 | 0.5787816  | -2.8156614 |
| C | -4.6634920 | 0.7242671  | -3.0272119 |
| C | -5.3268654 | 1.7480969  | -2.0894982 |
| C | -6.8284636 | 1.9140838  | -2.3788180 |
| C | -1.5458163 | -5.2865154 | 2.9554064  |
| C | -1.0177788 | -6.6105213 | 2.3784004  |
| C | -0.0185193 | -7.3003809 | 3.3218985  |
| O | -1.0754409 | -3.3047065 | 1.0804163  |
| O | -0.0007532 | -2.9420055 | -1.5264630 |
| C | 1.0269821  | -3.6349083 | -1.7758883 |
| N | 1.0972885  | -4.4651498 | -2.8252862 |
| C | 2.3000500  | -5.2612787 | -3.1523296 |
| C | 2.2797877  | -6.6963192 | -2.5995471 |
| C | 3.5061160  | -7.5069855 | -3.0526640 |
| O | -1.4233422 | -0.4740200 | -1.8580078 |
| O | 1.8201325  | -2.7940348 | 0.3033160  |
| C | 2.9034904  | -2.3214306 | 1.0975302  |
| C | 2.3194025  | -1.3048679 | 2.0759456  |
| N | 3.0280938  | -0.8739378 | 3.1177585  |
| C | 4.4075696  | -1.3256925 | 3.4024882  |
| C | 4.4897830  | -2.4778472 | 4.4177408  |
| C | 5.9435880  | -2.8431197 | 4.7634639  |
| C | 2.2421474  | -3.5024423 | -0.8562489 |
| O | 1.1437605  | -0.8764278 | 1.8425756  |

|   |            |            |            |
|---|------------|------------|------------|
| C | -2.3213839 | 1.5687578  | -3.4725432 |
| C | -1.8911739 | 1.1646569  | -4.8911620 |
| C | -1.0076286 | 2.2394816  | -5.5469402 |
| C | 2.4357254  | 0.1249082  | 4.0416881  |
| C | 2.7391302  | 1.5794795  | 3.6467143  |
| C | 2.1618740  | 2.5760593  | 4.6668232  |
| C | -0.0572271 | -4.5974170 | -3.7391975 |
| C | 0.0174502  | -3.6705411 | -4.9640491 |
| C | -1.1378619 | -3.9241702 | -5.9472407 |
| H | -4.7749496 | -3.3018357 | 3.2500988  |
| H | 2.2326045  | -6.6689994 | -1.4851740 |
| H | -3.8147169 | -3.8425531 | -0.3060334 |
| H | -4.1812410 | -2.6575755 | 1.0090661  |
| H | -3.9297627 | -6.2099936 | 2.5524812  |
| H | -4.5547452 | -5.0332583 | 1.3885520  |
| H | -6.0299793 | -6.0476505 | 3.9808737  |
| H | -6.7146433 | -4.9072134 | 2.7964519  |
| H | -1.9920405 | -5.4504851 | 3.9596894  |
| H | -0.7264685 | -4.5490509 | 3.0687578  |
| H | -0.5387672 | -6.4110438 | 1.3918660  |
| H | -0.5104604 | -7.4877513 | 4.3058755  |
| H | 0.8317599  | -6.6086121 | 3.5348874  |
| H | -4.3907381 | -0.8134425 | -0.7285595 |
| H | -4.0635600 | -2.0574155 | -2.0035324 |
| H | -5.1487805 | -0.2707686 | -2.9343616 |
| H | -4.8018541 | 1.0267717  | -4.0877987 |
| H | -4.8140593 | 2.7307534  | -2.1972995 |
| H | -6.9665417 | 2.2307789  | -3.4399315 |
| H | -7.3390424 | 0.9250963  | -2.2873071 |
| H | -1.4383815 | 1.7096176  | -2.8177628 |
| H | -2.8794661 | 2.5287851  | -3.4930680 |
| H | -1.3391599 | 0.1978121  | -4.8420577 |
| H | -0.1103638 | 2.4191949  | -4.9078858 |
| H | -1.5620014 | 3.2074490  | -5.5736652 |
| H | 3.6651987  | -1.8158385 | 0.4539046  |
| H | 3.3956179  | -3.1711044 | 1.6242086  |
| H | 4.9538102  | -0.4372500 | 3.7863010  |
| H | 4.9083329  | -1.5978387 | 2.4491684  |
| H | 3.9455202  | -2.1894310 | 5.3466314  |
| H | 6.4579267  | -1.9452071 | 5.1804063  |
| H | 6.4957185  | -3.1047482 | 3.8285014  |
| H | 2.8414413  | -0.1004225 | 5.0509713  |
| H | 1.3420180  | -0.0523614 | 4.0682567  |
| H | 2.3119949  | 1.7796358  | 2.6374091  |
| H | 2.5793012  | 2.3542929  | 5.6782244  |
| H | 1.0597323  | 2.4219071  | 4.7494444  |
| H | 2.6492115  | -4.4985889 | -0.5685115 |
| H | 3.0422682  | -2.9307061 | -1.3861202 |
| H | 3.2059592  | -4.7174507 | -2.8112135 |
| H | 2.3697211  | -5.2834507 | -4.2610401 |
| H | 3.5404111  | -7.5259795 | -4.1675924 |

|    |            |            |            |
|----|------------|------------|------------|
| H  | 4.4384497  | -6.9848595 | -2.7287216 |
| H  | -0.9737229 | -4.3919783 | -3.1508773 |
| H  | -0.0917282 | -5.6612447 | -4.0594014 |
| H  | 0.0036051  | -2.6114459 | -4.6187174 |
| H  | -2.1122502 | -3.7868593 | -5.4187573 |
| H  | -1.1177730 | -4.9913643 | -6.2733375 |
| N  | 1.4346790  | 0.7278787  | -1.0276229 |
| O  | 1.5989240  | -0.5648697 | -1.1279297 |
| O  | 2.1795961  | 1.5255503  | -1.5336123 |
| O  | 0.3970811  | 1.0430616  | -0.3292634 |
| H  | 3.9592351  | -3.3713536 | 4.0115180  |
| H  | -5.1724232 | 1.4401488  | -1.0286992 |
| H  | -2.7934351 | 0.9870087  | -5.5224836 |
| H  | -4.0991836 | -4.4690877 | 4.4105658  |
| H  | -1.8713858 | -7.3000254 | 2.1811315  |
| H  | 1.3482711  | -7.2073288 | -2.9359774 |
| H  | 3.8413847  | 1.7251482  | 3.5652685  |
| H  | 0.9883749  | -3.8213398 | -5.4902881 |
| C  | -6.8687052 | -4.2421837 | 4.8658218  |
| H  | -6.2616289 | -4.2923513 | 5.7996789  |
| H  | -6.9551854 | -3.1583793 | 4.6158950  |
| C  | 0.5280127  | -8.6282942 | 2.7701145  |
| H  | 1.0261814  | -8.4415032 | 1.7887232  |
| H  | -0.3262258 | -9.3108567 | 2.5511685  |
| C  | -7.5168504 | 2.9298511  | -1.4507354 |
| H  | -7.0036490 | 3.9152856  | -1.5446700 |
| H  | -7.3746344 | 2.6123463  | -0.3907543 |
| C  | -0.5551963 | 1.8762201  | -6.9713081 |
| H  | -0.0076081 | 0.9042093  | -6.9442171 |
| H  | -1.4547407 | 1.7028408  | -7.6078540 |
| C  | -1.0988877 | -3.0162814 | -7.1886026 |
| H  | -1.1130044 | -1.9490324 | -6.8629594 |
| H  | -0.1265193 | -3.1598799 | -7.7150964 |
| C  | 3.5197403  | -8.9499503 | -2.5203554 |
| H  | 2.5854846  | -9.4665804 | -2.8434557 |
| H  | 3.4883992  | -8.9300451 | -1.4051366 |
| N  | -2.3155320 | 0.1214225  | 1.8238318  |
| O  | -3.1314724 | 0.6543063  | 2.5320503  |
| O  | -1.6425552 | -0.9337262 | 2.1831993  |
| O  | -2.0320099 | 0.5196665  | 0.6268815  |
| Np | -0.3712314 | -1.2305903 | 0.1198797  |
| C  | -9.0130641 | 3.0978586  | -1.7433766 |
| H  | -9.4753534 | 3.8371927  | -1.0543590 |
| H  | -9.1866294 | 3.4560581  | -2.7827422 |
| H  | -9.5630075 | 2.1375977  | -1.6228253 |
| C  | 0.3312726  | 2.9491543  | -7.6159082 |
| H  | 0.6421542  | 2.6518270  | -8.6407044 |
| H  | -0.2031513 | 3.9219282  | -7.6978646 |
| H  | 1.2563435  | 3.1239670  | -7.0216970 |
| C  | -2.2536745 | -3.2755957 | -8.1644318 |
| H  | -2.1938383 | -2.6037324 | -9.0477372 |

|   |            |             |            |
|---|------------|-------------|------------|
| H | -2.2393230 | -4.3227204  | -8.5412955 |
| H | -3.2426946 | -3.1078326  | -7.6807904 |
| C | 4.7402773  | -9.7526070  | -2.9878157 |
| H | 4.7168898  | -10.7887297 | -2.5871026 |
| H | 4.7778347  | -9.8245562  | -4.0976277 |
| H | 5.6912303  | -9.2835634  | -2.6489321 |
| C | 6.0586325  | -4.0054260  | 5.7647626  |
| H | 5.5008682  | -3.7428275  | 6.6944438  |
| H | 5.5468432  | -4.9033545  | 5.3438587  |
| C | 2.4450493  | 4.0461325   | 4.3126807  |
| H | 3.5471683  | 4.1979018   | 4.2357312  |
| H | 2.0347272  | 4.2646171   | 3.2988312  |
| C | 7.5095807  | -4.3564232  | 6.1168102  |
| H | 8.0352347  | -3.4926628  | 6.5815080  |
| H | 7.5541316  | -5.2011577  | 6.8375419  |
| H | 8.0877814  | -4.6559581  | 5.2137600  |
| C | 1.5075785  | -9.3238083  | 3.7236007  |
| H | 1.8779716  | -10.2794259 | 3.2939911  |
| H | 2.3945397  | -8.6850718  | 3.9365758  |
| H | 1.0252858  | -9.5620577  | 4.6978547  |
| C | -8.2631701 | -4.8252545  | 5.1257482  |
| H | -8.2075423 | -5.8967189  | 5.4217420  |
| H | -8.7789848 | -4.2793181  | 5.9446606  |
| H | -8.9080615 | -4.7591636  | 4.2209190  |
| C | 1.8593479  | 5.0332138   | 5.3302198  |
| H | 2.2792584  | 4.8668237   | 6.3477197  |
| H | 2.0836260  | 6.0836633   | 5.0448985  |
| H | 0.7529535  | 4.9342377   | 5.4029580  |

### **Np(IV)-*iso*-Amyl DGA**

|   |            |            |            |
|---|------------|------------|------------|
| C | -6.1708665 | -4.8871018 | 3.6550078  |
| C | -4.7156230 | -4.4161104 | 3.4158974  |
| C | -3.9936681 | -5.1664807 | 2.2824464  |
| N | -2.6030167 | -4.7089896 | 2.0672340  |
| C | -2.2725836 | -3.7582517 | 1.1869465  |
| C | -3.3699571 | -3.1405361 | 0.3123623  |
| O | -2.7449366 | -2.1129786 | -0.4483260 |
| C | -3.5927286 | -1.4061650 | -1.3541269 |
| C | -2.6863635 | -0.3936812 | -2.0677079 |
| N | -3.2258545 | 0.5663761  | -2.8190893 |
| C | -4.6834582 | 0.7065205  | -3.0262401 |
| C | -5.3479024 | 1.6865076  | -2.0426543 |
| C | -6.8789517 | 1.8206968  | -2.2269308 |
| C | -1.5598119 | -5.3239299 | 2.9162758  |
| C | -1.0230395 | -6.6433723 | 2.3355787  |
| C | 0.0348802  | -7.3400009 | 3.2249847  |
| O | -1.0825476 | -3.3499447 | 1.0315813  |
| O | 0.0216347  | -2.9885907 | -1.5566754 |
| C | 1.0545271  | -3.6826021 | -1.7820633 |

|   |            |            |            |
|---|------------|------------|------------|
| N | 1.1385026  | -4.5323845 | -2.8143295 |
| C | 2.3500650  | -5.3236777 | -3.1208280 |
| C | 2.3323738  | -6.7447101 | -2.5326569 |
| C | 3.5787216  | -7.5888049 | -2.8969019 |
| O | -1.4335425 | -0.5148492 | -1.9071282 |
| O | 1.8216610  | -2.8135467 | 0.2956149  |
| C | 2.8916050  | -2.3200698 | 1.0949807  |
| C | 2.2879342  | -1.2926112 | 2.0493686  |
| N | 2.9841736  | -0.8258890 | 3.0836461  |
| C | 4.3644515  | -1.2565004 | 3.3948642  |
| C | 4.4317606  | -2.3882978 | 4.4344437  |
| C | 5.8734526  | -2.7957565 | 4.8259717  |
| C | 2.2606449  | -3.5290892 | -0.8531472 |
| O | 1.1072993  | -0.8861501 | 1.8008114  |
| C | -2.3526004 | 1.5952104  | -3.4317828 |
| C | -1.9224346 | 1.2540813  | -4.8670635 |
| C | -1.0103174 | 2.3269780  | -5.5099516 |
| C | 2.3757703  | 0.1988619  | 3.9686737  |
| C | 2.6669374  | 1.6354684  | 3.5022909  |
| C | 2.1883852  | 2.7207339  | 4.4970122  |
| C | -0.0069480 | -4.6923232 | -3.7354233 |
| C | 0.0692497  | -3.7693951 | -4.9636287 |
| C | -1.0743396 | -3.9955098 | -5.9823972 |
| H | -4.7161346 | -3.3249624 | 3.1860064  |
| H | 2.2484027  | -6.6755999 | -1.4223670 |
| H | -3.8072103 | -3.9077180 | -0.3718290 |
| H | -4.1938102 | -2.7208730 | 0.9356650  |
| H | -3.9349168 | -6.2524443 | 2.5036416  |
| H | -4.5607868 | -5.0833954 | 1.3314850  |
| H | -6.7158128 | -4.8025024 | 2.6830734  |
| H | -2.0177094 | -5.4820939 | 3.9146092  |
| H | -0.7431906 | -4.5837139 | 3.0323217  |
| H | -0.5807227 | -6.4295511 | 1.3351851  |
| H | 0.8499366  | -6.6001291 | 3.4175147  |
| H | -4.4134716 | -0.8979022 | -0.7995681 |
| H | -4.0456292 | -2.1191110 | -2.0855838 |
| H | -5.1596798 | -0.2956389 | -2.9686718 |
| H | -4.8183735 | 1.0444102  | -4.0749891 |
| H | -4.8770885 | 2.6912749  | -2.1498051 |
| H | -7.3204355 | 0.7969393  | -2.1411897 |
| H | -1.4685882 | 1.7144854  | -2.7740164 |
| H | -2.9258758 | 2.5442351  | -3.4015864 |
| H | -1.3835315 | 0.2792644  | -4.8494706 |
| H | -0.1328506 | 2.4669054  | -4.8331707 |
| H | 3.6567878  | -1.8181883 | 0.4526388  |
| H | 3.3849755  | -3.1568891 | 1.6408610  |
| H | 4.8931556  | -0.3520394 | 3.7616297  |
| H | 4.8789840  | -1.5495331 | 2.4549604  |
| H | 3.8772015  | -2.0800655 | 5.3519059  |
| H | 6.4267927  | -3.0293173 | 3.8831139  |
| H | 2.7897407  | 0.0240432  | 4.9848452  |

|   |            |            |            |
|---|------------|------------|------------|
| H | 1.2873528  | 0.0002282  | 4.0033534  |
| H | 2.1839044  | 1.8004910  | 2.5107758  |
| H | 2.6897138  | 2.5208637  | 5.4754225  |
| H | 2.6753812  | -4.5180501 | -0.5520460 |
| H | 3.0592674  | -2.9544639 | -1.3822597 |
| H | 3.2494982  | -4.7669845 | -2.7830030 |
| H | 2.4216702  | -5.3608084 | -4.2275265 |
| H | 4.4814963  | -7.0027935 | -2.5959370 |
| H | -0.9314933 | -4.4920063 | -3.1577608 |
| H | -0.0190725 | -5.7602668 | -4.0377679 |
| H | 0.0472890  | -2.7140785 | -4.6081884 |
| H | -2.0399257 | -3.9302064 | -5.4227568 |
| N | 1.4160043  | 0.6942011  | -1.0734004 |
| O | 1.5879827  | -0.5981598 | -1.1651544 |
| O | 2.1589136  | 1.4928888  | -1.5813580 |
| O | 0.3742190  | 1.0082771  | -0.3813782 |
| H | 3.8949642  | -3.2788853 | 4.0306338  |
| H | -5.1280431 | 1.3588998  | -0.9996488 |
| H | -4.1346674 | -4.5290451 | 4.3605413  |
| H | -1.8691088 | -7.3502326 | 2.1637867  |
| H | 1.4158733  | -7.2774881 | -2.8797239 |
| H | 3.7650466  | 1.7512487  | 3.3490696  |
| H | 1.0468564  | -3.9115863 | -5.4820558 |
| C | -6.8631168 | -3.9518170 | 4.6627582  |
| H | -7.9243936 | -4.2465963 | 4.8122093  |
| H | -6.3617856 | -3.9915528 | 5.6564333  |
| H | -6.8520522 | -2.8934371 | 4.3192945  |
| C | 0.6508613  | -8.5333572 | 2.4720915  |
| H | 1.1020767  | -8.2215084 | 1.5030692  |
| H | 1.4478742  | -9.0187828 | 3.0763884  |
| H | -0.1183677 | -9.3082230 | 2.2526547  |
| C | -7.4664585 | 2.6803298  | -1.0934233 |
| H | -7.0635230 | 3.7178704  | -1.1283263 |
| H | -8.5724551 | 2.7484495  | -1.1798286 |
| H | -7.2304033 | 2.2592688  | -0.0906614 |
| C | -0.4815623 | 1.8250769  | -6.8656684 |
| H | 0.2151638  | 2.5638227  | -7.3182327 |
| H | 0.0689752  | 0.8630098  | -6.7634288 |
| H | -1.3146249 | 1.6659827  | -7.5880495 |
| C | -1.0677801 | -2.8771330 | -7.0393619 |
| H | -1.1628804 | -1.8702682 | -6.5745409 |
| H | -0.1229373 | -2.8890430 | -7.6286591 |
| H | -1.9082092 | -3.0010304 | -7.7565561 |
| C | 3.5804336  | -8.8988750 | -2.0882650 |
| H | 2.6947979  | -9.5258060 | -2.3393627 |
| H | 4.4880969  | -9.5007700 | -2.3096470 |
| H | 3.5628215  | -8.7071935 | -0.9919729 |
| N | -2.3541221 | 0.0626333  | 1.7674661  |
| O | -3.1849882 | 0.5861241  | 2.4659431  |
| O | -1.6825880 | -0.9912895 | 2.1288957  |
| O | -2.0540048 | 0.4725725  | 0.5779883  |

|    |            |            |            |
|----|------------|------------|------------|
| Np | -0.3863005 | -1.2710208 | 0.0722932  |
| C  | 5.8407444  | -4.0767189 | 5.6791096  |
| H  | 6.8699347  | -4.4046139 | 5.9409607  |
| H  | 5.2908582  | -3.9097315 | 6.6333930  |
| H  | 5.3454590  | -4.9174514 | 5.1434571  |
| C  | 2.6433692  | 4.1101768  | 4.0153558  |
| H  | 2.1694017  | 4.3737726  | 3.0423255  |
| H  | 2.3605245  | 4.8954884  | 4.7495058  |
| H  | 3.7467737  | 4.1581365  | 3.8805258  |
| C  | -0.5304215 | -7.7877149 | 4.5856824  |
| H  | -1.3704563 | -8.5070714 | 4.4519616  |
| H  | 0.2518458  | -8.3019876 | 5.1853039  |
| H  | -0.9011604 | -6.9387017 | 5.2021254  |
| C  | -6.2529918 | -6.3529207 | 4.1192234  |
| H  | -5.8471006 | -7.0707133 | 3.3714256  |
| H  | -5.6991569 | -6.5012267 | 5.0745731  |
| H  | -7.3096228 | -6.6459706 | 4.3015153  |
| C  | -7.2633663 | 2.3891469  | -3.6053494 |
| H  | -6.8172076 | 3.3983703  | -3.7607009 |
| H  | -6.9423096 | 1.7380831  | -4.4489830 |
| H  | -8.3662774 | 2.4995143  | -3.6885671 |
| C  | -1.0085422 | -5.3795565 | -6.6550326 |
| H  | -0.0568055 | -5.5023112 | -7.2209134 |
| H  | -1.0871408 | -6.2206858 | -5.9301066 |
| H  | -1.8416103 | -5.5044270 | -7.3805074 |
| C  | 3.6801106  | -7.8758176 | -4.4062128 |
| H  | 2.7907357  | -8.4422645 | -4.7662759 |
| H  | 3.7705863  | -6.9519055 | -5.0195006 |
| H  | 4.5767487  | -8.4946741 | -4.6261916 |
| H  | -2.8249814 | 1.1119862  | -5.5084899 |
| C  | -1.7112443 | 3.6890824  | -5.6679987 |
| H  | -1.0334703 | 4.4228234  | -6.1558915 |
| H  | -2.6200176 | 3.6020256  | -6.3072501 |
| H  | -2.0169433 | 4.1345906  | -4.6952469 |
| C  | 0.6665264  | 2.6873126  | 4.7278787  |
| H  | 0.1131394  | 2.8423148  | 3.7729715  |
| H  | 0.3178862  | 1.7294719  | 5.1749069  |
| H  | 0.3595666  | 3.4973881  | 5.4246077  |
| C  | 6.6286032  | -1.6696447 | 5.5559628  |
| H  | 6.7486369  | -0.7528784 | 4.9366597  |
| H  | 6.1071803  | -1.3828496 | 6.4979937  |
| H  | 7.6518634  | -2.0027752 | 5.8337412  |

#### **Pu(IV)-*n*-Butyl DGA**

|   |            |            |           |
|---|------------|------------|-----------|
| C | -6.0867590 | -5.0211167 | 3.6960608 |
| C | -4.6748474 | -4.4485600 | 3.4780696 |
| C | -3.9480349 | -5.1238664 | 2.3022537 |
| N | -2.5613941 | -4.6485987 | 2.1031018 |
| C | -2.2337186 | -3.6678511 | 1.2527690 |



|   |            |            |            |
|---|------------|------------|------------|
| C | -3.3319065 | -3.0293582 | 0.3953867  |
| O | -2.7121016 | -1.9912656 | -0.3545077 |
| C | -3.5595573 | -1.2993740 | -1.2702450 |
| C | -2.6591828 | -0.2913963 | -1.9968351 |
| N | -3.2066578 | 0.6373352  | -2.7852985 |
| C | -4.6629129 | 0.7490049  | -3.0139172 |
| C | -5.3618856 | 1.7527979  | -2.0802763 |
| C | -6.8637604 | 1.8887549  | -2.3882730 |
| C | -1.5119725 | -5.2827859 | 2.9295006  |
| C | -0.9468769 | -6.5702442 | 2.3069912  |
| C | 0.0823038  | -7.2579390 | 3.2210207  |
| O | -1.0450168 | -3.2525843 | 1.1175040  |
| O | -0.0801154 | -2.9380942 | -1.4731190 |
| C | 0.9464225  | -3.6265584 | -1.7245158 |
| N | 1.0305171  | -4.4411916 | -2.7882255 |
| C | 2.2136567  | -5.2767206 | -3.0825829 |
| C | 2.1165543  | -6.7141020 | -2.5442708 |
| C | 3.3290299  | -7.5727526 | -2.9458019 |
| O | -1.4088172 | -0.3841630 | -1.8214372 |
| O | 1.7663082  | -2.7435823 | 0.3343293  |
| C | 2.8597817  | -2.3439095 | 1.1529132  |
| C | 2.3252688  | -1.2672178 | 2.0956148  |
| N | 3.0525824  | -0.8272348 | 3.1195226  |
| C | 4.4006337  | -1.3469597 | 3.4375390  |
| C | 4.4030307  | -2.4436373 | 4.5158372  |
| C | 5.8285796  | -2.8883141 | 4.8906447  |
| C | 2.1583403  | -3.5182972 | -0.7947723 |
| O | 1.1710032  | -0.7950341 | 1.8371803  |
| C | -2.3372751 | 1.6491620  | -3.4297196 |
| C | -1.8829284 | 1.2615154  | -4.8454154 |
| C | -1.0205349 | 2.3608350  | -5.4907596 |
| C | 2.5213437  | 0.2589988  | 3.9804495  |
| C | 2.9062487  | 1.6622282  | 3.4822427  |
| C | 2.4004534  | 2.7663972  | 4.4280464  |
| C | -0.0886882 | -4.5108782 | -3.7508460 |
| C | 0.0932729  | -3.5700640 | -4.9535236 |
| C | -1.0260860 | -3.7285230 | -5.9967453 |
| H | -4.7324838 | -3.3485938 | 3.3023640  |
| H | 2.0192678  | -6.6919700 | -1.4325380 |
| H | -3.7763420 | -3.7835244 | -0.2984439 |
| H | -4.1493671 | -2.6191068 | 1.0335068  |
| H | -3.8876775 | -6.2211473 | 2.4690100  |
| H | -4.5206556 | -4.9969024 | 1.3597366  |
| H | -6.0136424 | -6.1216981 | 3.8598017  |
| H | -6.6866962 | -4.8904946 | 2.7647636  |
| H | -1.9656944 | -5.4968962 | 3.9208128  |
| H | -0.7093242 | -4.5341293 | 3.0833273  |
| H | -0.4806040 | -6.3232022 | 1.3249424  |
| H | -0.3959387 | -7.4935532 | 4.2003305  |
| H | 0.9069301  | -6.5423052 | 3.4508739  |
| H | -4.3862186 | -0.7898431 | -0.7245787 |

|   |            |            |            |
|---|------------|------------|------------|
| H | -4.0072593 | -2.0225157 | -1.9950175 |
| H | -5.1262768 | -0.2574760 | -2.9317030 |
| H | -4.7965931 | 1.0530803  | -4.0747347 |
| H | -4.8694917 | 2.7473816  | -2.1753449 |
| H | -6.9920630 | 2.2037890  | -3.4501422 |
| H | -7.3518715 | 0.8886719  | -2.3059314 |
| H | -1.4639294 | 1.8076718  | -2.7657913 |
| H | -2.9166669 | 2.5965678  | -3.4526912 |
| H | -1.3065049 | 0.3091107  | -4.7941720 |
| H | -0.1331071 | 2.5562481  | -4.8442505 |
| H | -1.5984675 | 3.3140876  | -5.5129590 |
| H | 3.6803135  | -1.9142680 | 0.5256946  |
| H | 3.2697001  | -3.2189465 | 1.7088091  |
| H | 5.0011918  | -0.4747894 | 3.7750041  |
| H | 4.8853387  | -1.7054928 | 2.5049905  |
| H | 3.8786105  | -2.0675637 | 5.4242155  |
| H | 6.4036573  | -2.0033538 | 5.2500195  |
| H | 6.3580001  | -3.2469508 | 3.9763383  |
| H | 2.9213017  | 0.0784645  | 5.0009416  |
| H | 1.4195341  | 0.1463124  | 4.0230929  |
| H | 2.4828275  | 1.8141909  | 2.4627364  |
| H | 2.8171632  | 2.5962480  | 5.4485754  |
| H | 1.2933275  | 2.6829304  | 4.5299931  |
| H | 2.5099389  | -4.5218791 | -0.4622818 |
| H | 2.9934946  | -3.0097439 | -1.3336212 |
| H | 3.1278232  | -4.7734666 | -2.7029286 |
| H | 2.3240159  | -5.2922440 | -4.1879965 |
| H | 3.4157757  | -7.5831079 | -4.0571828 |
| H | 4.2634284  | -7.0914046 | -2.5718315 |
| H | -1.0195530 | -4.2672898 | -3.2006732 |
| H | -0.1619587 | -5.5672099 | -4.0891387 |
| H | 0.1303041  | -2.5186044 | -4.5868248 |
| H | -2.0116436 | -3.5221387 | -5.5152991 |
| H | -1.0685645 | -4.7909362 | -6.3326902 |
| N | 1.4210280  | 0.6292831  | -1.2219849 |
| O | 1.4630223  | -0.6571625 | -1.3861859 |
| O | 2.1433998  | 1.3970654  | -1.8038232 |
| O | 0.5233228  | 1.0006167  | -0.3662635 |
| H | 3.8134876  | -3.3204672 | 4.1567441  |
| H | -5.2165177 | 1.4424427  | -1.0186152 |
| H | -2.7742032 | 1.0630347  | -5.4864370 |
| H | -4.0729653 | -4.5786879 | 4.4064379  |
| H | -1.7792426 | -7.2799848 | 2.0917760  |
| H | 1.1822929  | -7.1868338 | -2.9263273 |
| H | 4.0146677  | 1.7348629  | 3.3855431  |
| H | 1.0767350  | -3.7706694 | -5.4394813 |
| C | -6.8200813 | -4.3734668 | 4.8773968  |
| H | -7.8347100 | -4.8089496 | 5.0006847  |
| H | -6.2703957 | -4.5296545 | 5.8320676  |
| H | -6.9407243 | -3.2766161 | 4.7326615  |
| C | 0.6639103  | -8.5421922 | 2.6160597  |

|    |            |            |            |
|----|------------|------------|------------|
| H  | 1.1839783  | -8.3421601 | 1.6516474  |
| H  | 1.4004366  | -9.0105999 | 3.3037597  |
| H  | -0.1314667 | -9.2944962 | 2.4180902  |
| C  | -7.5745461 | 2.8873603  | -1.4658110 |
| H  | -7.1376739 | 3.9065238  | -1.5570673 |
| H  | -8.6537040 | 2.9621411  | -1.7187171 |
| H  | -7.4995979 | 2.5824083  | -0.3980630 |
| C  | -0.5589933 | 2.0099037  | -6.9106462 |
| H  | 0.0602606  | 2.8259895  | -7.3409211 |
| H  | 0.0557440  | 1.0818666  | -6.9222907 |
| H  | -1.4237510 | 1.8518909  | -7.5931874 |
| C  | -0.8430453 | -2.8149726 | -7.2154045 |
| H  | -0.8248790 | -1.7410816 | -6.9224077 |
| H  | 0.1100775  | -3.0333371 | -7.7465951 |
| H  | -1.6693573 | -2.9513211 | -7.9455978 |
| C  | 3.2459851  | -9.0126723 | -2.4242505 |
| H  | 2.3442389  | -9.5351165 | -2.8145702 |
| H  | 4.1342561  | -9.6011926 | -2.7387122 |
| H  | 3.2009114  | -9.0437357 | -1.3122652 |
| N  | -2.3064921 | 0.1995992  | 1.8283284  |
| O  | -3.1109371 | 0.7616208  | 2.5264429  |
| O  | -1.7254566 | -0.9122342 | 2.1658135  |
| O  | -1.9456930 | 0.6263737  | 0.6612549  |
| Pu | -0.3634999 | -1.1746821 | 0.1549170  |
| C  | 5.8499047  | -3.9847007 | 5.9631236  |
| H  | 6.8928309  | -4.2748406 | 6.2123680  |
| H  | 5.3646596  | -3.6425657 | 6.9041820  |
| H  | 5.3198371  | -4.9020893 | 5.6214381  |
| C  | 2.7700925  | 4.1766884  | 3.9503088  |
| H  | 2.3355332  | 4.3959566  | 2.9494808  |
| H  | 2.3906524  | 4.9457329  | 4.6567115  |
| H  | 3.8729162  | 4.3056637  | 3.8763492  |

### **Pu(IV)-*iso*-Butyl DGA**

|   |            |            |            |
|---|------------|------------|------------|
| C | -6.2345121 | -4.7812737 | 3.5252656  |
| C | -4.8027176 | -4.2202450 | 3.4450856  |
| C | -3.9973551 | -5.0763406 | 2.4353506  |
| N | -2.6007407 | -4.6442300 | 2.1936031  |
| C | -2.2813397 | -3.7001536 | 1.2984214  |
| C | -3.3811354 | -3.0996625 | 0.4179546  |
| O | -2.7691029 | -2.0772908 | -0.3597371 |
| C | -3.6348965 | -1.4013121 | -1.2725389 |
| C | -2.7581085 | -0.3717024 | -1.9962017 |
| N | -3.3106298 | 0.5532805  | -2.7870763 |
| C | -4.7641946 | 0.6567170  | -3.0430948 |
| C | -5.4850337 | 1.8069311  | -2.2981024 |
| C | -6.9263229 | 1.9102607  | -2.8293701 |
| C | -1.5166252 | -5.2509125 | 3.0002141  |
| C | -0.7501791 | -6.3937044 | 2.2948847  |

|   |            |            |            |
|---|------------|------------|------------|
| C | 0.3895967  | -6.8641085 | 3.2164930  |
| O | -1.0914317 | -3.2967786 | 1.1333716  |
| O | -0.1303896 | -2.9892197 | -1.4741497 |
| C | 0.9111693  | -3.6535129 | -1.7311070 |
| N | 1.0100915  | -4.4547706 | -2.8051850 |
| C | 2.2124981  | -5.2716446 | -3.0852764 |
| C | 2.2552260  | -6.6680356 | -2.4176950 |
| C | 3.5995939  | -7.3356334 | -2.7603854 |
| O | -1.5057791 | -0.4401881 | -1.8158603 |
| O | 1.7127412  | -2.7599120 | 0.3293763  |
| C | 2.7968315  | -2.3487121 | 1.1548906  |
| C | 2.2468041  | -1.2840837 | 2.1019002  |
| N | 2.9625871  | -0.8547063 | 3.1413002  |
| C | 4.2827111  | -1.4320093 | 3.4865200  |
| C | 4.2545001  | -2.7064837 | 4.3682328  |
| C | 5.7047491  | -3.1802116 | 4.5784835  |
| C | 2.1224860  | -3.5175644 | -0.8053410 |
| O | 1.1009420  | -0.8065020 | 1.8170108  |
| C | -2.4236991 | 1.5700718  | -3.4062697 |
| C | -1.6748609 | 1.1121338  | -4.6787792 |
| C | -0.7201129 | 2.2399195  | -5.1113991 |
| C | 2.4677827  | 0.2802558  | 3.9603919  |
| C | 3.1592582  | 1.6320045  | 3.6581205  |
| C | 2.5844570  | 2.6913671  | 4.6167286  |
| C | -0.1133440 | -4.4928031 | -3.7686136 |
| C | -0.1345518 | -3.3220617 | -4.7791637 |
| C | -1.3817042 | -3.4651218 | -5.6695710 |
| H | -4.8631831 | -3.1804307 | 3.0428480  |
| H | 2.2180255  | -6.5183793 | -1.3114272 |
| H | -3.8112824 | -3.8825496 | -0.2534099 |
| H | -4.2090573 | -2.6795778 | 1.0342466  |
| H | -3.9461084 | -6.1243297 | 2.7970939  |
| H | -4.5326700 | -5.1183574 | 1.4624225  |
| H | -6.2382046 | -5.8167161 | 3.9345356  |
| H | -6.7327408 | -4.8069551 | 2.5303515  |
| H | -1.9807804 | -5.6255771 | 3.9349298  |
| H | -0.8122006 | -4.4383394 | 3.2728539  |
| H | -0.2961033 | -5.9611474 | 1.3730957  |
| H | -0.0083658 | -7.2946027 | 4.1630997  |
| H | 1.0762302  | -6.0307903 | 3.4872506  |
| H | -4.4675680 | -0.9112546 | -0.7211674 |
| H | -4.0678270 | -2.1323171 | -1.9982722 |
| H | -5.2474207 | -0.3155768 | -2.8060076 |
| H | -4.8820471 | 0.7980120  | -4.1383303 |
| H | -4.9593471 | 2.7545085  | -2.5604082 |
| H | -6.9526693 | 2.0841009  | -3.9277304 |
| H | -7.5059021 | 0.9831679  | -2.6155585 |
| H | -1.6922789 | 1.8798938  | -2.6316502 |
| H | -3.0625105 | 2.4477197  | -3.6382185 |
| H | -1.0571346 | 0.2285904  | -4.3961581 |
| H | 0.0026169  | 2.4993532  | -4.3069102 |

|    |            |            |            |
|----|------------|------------|------------|
| H  | -1.2805716 | 3.1643414  | -5.3799088 |
| H  | 3.6101115  | -1.8949718 | 0.5344069  |
| H  | 3.2230243  | -3.2216799 | 1.6989041  |
| H  | 4.8439101  | -0.6312373 | 4.0118041  |
| H  | 4.8447698  | -1.6292482 | 2.5478285  |
| H  | 6.2935779  | -2.4286253 | 5.1508444  |
| H  | 6.2308649  | -3.3615655 | 3.6146988  |
| H  | 2.6310723  | 0.0043242  | 5.0226680  |
| H  | 1.3757297  | 0.3584065  | 3.7888278  |
| H  | 2.7080047  | 2.3977399  | 5.6826927  |
| H  | 1.4997339  | 2.8589800  | 4.4296178  |
| H  | 2.5061410  | -4.5107650 | -0.4796666 |
| H  | 2.9392783  | -2.9817805 | -1.3464329 |
| H  | 3.1171500  | -4.6896680 | -2.8052997 |
| H  | 2.2647095  | -5.3900107 | -4.1870391 |
| H  | 3.6904921  | -7.5169503 | -3.8551032 |
| H  | 4.4681942  | -6.7143326 | -2.4472312 |
| H  | -1.0562288 | -4.4979294 | -3.1832572 |
| H  | -0.0450989 | -5.4605293 | -4.3069730 |
| H  | -0.2329197 | -2.3824196 | -4.1878480 |
| H  | -2.3192221 | -3.5050163 | -5.0704060 |
| H  | -1.3358440 | -4.3914007 | -6.2861419 |
| N  | 1.3088121  | 0.6044607  | -1.2498633 |
| O  | 1.3740906  | -0.6821611 | -1.4044243 |
| O  | 2.0117430  | 1.3809327  | -1.8450735 |
| O  | 0.4124775  | 0.9658341  | -0.3900921 |
| H  | 3.7126268  | -3.5027384 | 3.8019451  |
| H  | 4.2447090  | 1.5221173  | 3.8924853  |
| N  | -2.3830860 | 0.1465851  | 1.8341032  |
| O  | -3.1844431 | 0.7081696  | 2.5364783  |
| O  | -1.7990040 | -0.9643143 | 2.1676960  |
| O  | -2.0280296 | 0.5741763  | 0.6655201  |
| Pu | -0.4370764 | -1.2220077 | 0.1489199  |
| H  | -7.4596309 | 2.7552055  | -2.3438928 |
| H  | -0.1343084 | 1.9363835  | -6.0058287 |
| H  | -1.4655000 | -2.6062075 | -6.3701161 |
| H  | 3.6891815  | -8.3198174 | -2.2526925 |
| H  | 5.7250713  | -4.1282807 | 5.1570671  |
| H  | 0.9939797  | -7.6562169 | 2.7234615  |
| H  | -6.8601992 | -4.1562707 | 4.1975613  |
| H  | 3.1033095  | 3.6636714  | 4.4760646  |
| C  | 3.5266245  | -2.5098174 | 5.7082608  |
| H  | 4.0082866  | -1.7131483 | 6.3192426  |
| H  | 2.4529959  | -2.2498697 | 5.5774123  |
| H  | 3.5653581  | -3.4468090 | 6.3045811  |
| C  | 3.0271867  | 2.0600501  | 2.1888294  |
| H  | 3.4940614  | 1.3269621  | 1.4921601  |
| H  | 1.9629091  | 2.1900983  | 1.8921532  |
| H  | 3.5428549  | 3.0304393  | 2.0225600  |
| C  | 1.0671472  | -7.5630006 | -2.8074173 |
| H  | 0.0903259  | -7.1255785 | -2.5050146 |

|   |            |            |            |
|---|------------|------------|------------|
| H | 1.0417318  | -7.7477924 | -3.9054479 |
| H | 1.1521993  | -8.5541220 | -2.3116188 |
| C | 1.1463689  | -3.2284331 | -5.6245820 |
| H | 1.3058140  | -4.1494042 | -6.2311827 |
| H | 1.0804016  | -2.3769956 | -6.3364411 |
| H | 2.0524837  | -3.0572626 | -5.0022066 |
| C | -2.6177323 | 0.7016731  | -5.8217349 |
| H | -3.2799486 | 1.5440291  | -6.1257263 |
| H | -2.0333736 | 0.4066492  | -6.7206558 |
| H | -3.2601145 | -0.1666110 | -5.5530330 |
| C | -5.4529548 | 1.6573708  | -0.7691558 |
| H | -6.0414266 | 0.7688126  | -0.4388453 |
| H | -4.4189580 | 1.5762679  | -0.3648070 |
| H | -5.9166779 | 2.5433601  | -0.2840645 |
| C | -4.1496020 | -4.1391928 | 4.8346961  |
| H | -4.0479108 | -5.1480603 | 5.2964059  |
| H | -3.1467129 | -3.6598272 | 4.8034299  |
| H | -4.7795760 | -3.5292449 | 5.5175137  |
| C | -1.6559206 | -7.5666654 | 1.8842694  |
| H | -1.0615119 | -8.3644769 | 1.3880201  |
| H | -2.1484083 | -8.0295576 | 2.7694867  |
| H | -2.4493907 | -7.2592291 | 1.1674528  |

#### **Pu(IV)-*n*-Amyl DGA**

|   |            |            |            |
|---|------------|------------|------------|
| C | -6.0693575 | -5.0977067 | 3.7362411  |
| C | -4.6727018 | -4.4978337 | 3.5010933  |
| C | -3.9428252 | -5.1690361 | 2.3249064  |
| N | -2.5589536 | -4.6858969 | 2.1245361  |
| C | -2.2372487 | -3.7031485 | 1.2744864  |
| C | -3.3392567 | -3.0705016 | 0.4176585  |
| O | -2.7258985 | -2.0279740 | -0.3313283 |
| C | -3.5745712 | -1.3479862 | -1.2546244 |
| C | -2.6803643 | -0.3330240 | -1.9791043 |
| N | -3.2329895 | 0.5895809  | -2.7711716 |
| C | -4.6882990 | 0.6802557  | -3.0147918 |
| C | -5.4136132 | 1.6755154  | -2.0922942 |
| C | -6.9129739 | 1.7829478  | -2.4188908 |
| C | -1.5059337 | -5.3158528 | 2.9499543  |
| C | -0.9431112 | -6.6060982 | 2.3310321  |
| C | 0.0780034  | -7.2972129 | 3.2500461  |
| O | -1.0508869 | -3.2813579 | 1.1384952  |
| O | -0.0982861 | -2.9612032 | -1.4566565 |
| C | 0.9286407  | -3.6475149 | -1.7123840 |
| N | 1.0114731  | -4.4600450 | -2.7778145 |
| C | 2.1953227  | -5.2938086 | -3.0747378 |
| C | 2.1037486  | -6.7311918 | -2.5354134 |
| C | 3.3215258  | -7.5815786 | -2.9350027 |
| O | -1.4301039 | -0.4131812 | -1.7975822 |
| O | 1.7535917  | -2.7662245 | 0.3455365  |

|   |            |            |            |
|---|------------|------------|------------|
| C | 2.8498287  | -2.3610582 | 1.1576218  |
| C | 2.3142680  | -1.2909739 | 2.1071600  |
| N | 3.0436335  | -0.8524714 | 3.1301124  |
| C | 4.3967846  | -1.3650047 | 3.4381300  |
| C | 4.4121880  | -2.4694698 | 4.5082528  |
| C | 5.8423260  | -2.9013058 | 4.8762051  |
| C | 2.1431523  | -3.5383238 | -0.7861836 |
| O | 1.1566713  | -0.8229434 | 1.8557637  |
| C | -2.3709249 | 1.6127892  | -3.4073853 |
| C | -1.9106020 | 1.2409924  | -4.8253212 |
| C | -1.0480887 | 2.3496552  | -5.4521273 |
| C | 2.5094499  | 0.2247226  | 4.0005577  |
| C | 2.8814158  | 1.6339695  | 3.5096493  |
| C | 2.3768670  | 2.7257988  | 4.4687959  |
| C | -0.1089379 | -4.5289413 | -3.7393054 |
| C | 0.0791278  | -3.5978952 | -4.9487395 |
| C | -1.0434968 | -3.7517655 | -5.9878592 |
| H | -4.7534826 | -3.4009310 | 3.3162549  |
| H | 2.0044390  | -6.7085687 | -1.4240619 |
| H | -3.7787892 | -3.8270006 | -0.2767546 |
| H | -4.1593194 | -2.6658946 | 1.0560214  |
| H | -3.8752210 | -6.2656742 | 2.4927509  |
| H | -4.5168708 | -5.0466721 | 1.3827052  |
| H | -5.9720519 | -6.1942199 | 3.9198631  |
| H | -6.6805939 | -4.9974094 | 2.8075120  |
| H | -1.9564929 | -5.5260445 | 3.9435433  |
| H | -0.7035159 | -4.5659066 | 3.0980795  |
| H | -0.4725462 | -6.3619128 | 1.3505258  |
| H | -0.4042418 | -7.5287447 | 4.2294513  |
| H | 0.9096395  | -6.5889222 | 3.4818462  |
| H | -4.4097388 | -0.8447923 | -0.7159858 |
| H | -4.0104345 | -2.0782746 | -1.9794949 |
| H | -5.1377504 | -0.3327253 | -2.9351012 |
| H | -4.8149700 | 0.9796824  | -4.0777431 |
| H | -4.9370043 | 2.6777459  | -2.1861125 |
| H | -7.0366226 | 2.0910511  | -3.4842874 |
| H | -7.3874639 | 0.7752227  | -2.3362406 |
| H | -1.5001824 | 1.7731879  | -2.7406384 |
| H | -2.9580054 | 2.5556155  | -3.4239838 |
| H | -1.3333936 | 0.2888546  | -4.7829055 |
| H | -0.1541456 | 2.5290391  | -4.8084982 |
| H | -1.6211282 | 3.3071703  | -5.4530308 |
| H | 3.6628701  | -1.9238403 | 0.5258858  |
| H | 3.2696998  | -3.2346394 | 1.7083122  |
| H | 4.9923575  | -0.4909069 | 3.7792971  |
| H | 4.8796674  | -1.7129442 | 2.5006363  |
| H | 3.8854163  | -2.1050065 | 5.4199020  |
| H | 6.4083559  | -2.0154557 | 5.2501288  |
| H | 6.3786774  | -3.2419136 | 3.9578295  |
| H | 2.9165058  | 0.0404511  | 5.0175304  |
| H | 1.4087697  | 0.1037144  | 4.0485900  |

|    |            |            |            |
|----|------------|------------|------------|
| H  | 2.4482098  | 1.7904222  | 2.4951188  |
| H  | 2.8074645  | 2.5551094  | 5.4844732  |
| H  | 1.2708180  | 2.6339788  | 4.5844666  |
| H  | 2.4978115  | -4.5417216 | -0.4564961 |
| H  | 2.9754183  | -3.0272450 | -1.3270952 |
| H  | 3.1094241  | -4.7882792 | -2.6979777 |
| H  | 2.3028029  | -5.3098221 | -4.1803115 |
| H  | 3.4122215  | -7.5928296 | -4.0469468 |
| H  | 4.2542326  | -7.0964328 | -2.5587100 |
| H  | -1.0372818 | -4.2747805 | -3.1898180 |
| H  | -0.1899342 | -5.5871435 | -4.0700128 |
| H  | 0.1281050  | -2.5447008 | -4.5890338 |
| H  | -2.0271652 | -3.5219077 | -5.5108424 |
| H  | -1.1050299 | -4.8177452 | -6.3126749 |
| N  | 1.3969545  | 0.6083698  | -1.2039638 |
| O  | 1.4445700  | -0.6780894 | -1.3661997 |
| O  | 2.1142887  | 1.3783655  | -1.7893984 |
| O  | 0.5000749  | 0.9771682  | -0.3465579 |
| H  | 3.8306953  | -3.3490775 | 4.1433760  |
| H  | -5.2747816 | 1.3712140  | -1.0281957 |
| H  | -2.7991498 | 1.0491275  | -5.4718027 |
| H  | -4.0598707 | -4.6080638 | 4.4246595  |
| H  | -1.7779780 | -7.3119602 | 2.1133793  |
| H  | 1.1724309  | -7.2082058 | -2.9189040 |
| H  | 3.9883807  | 1.7136704  | 3.4039781  |
| H  | 1.0592132  | -3.8119996 | -5.4354026 |
| C  | -6.8198534 | -4.4504944 | 4.9126426  |
| H  | -6.2025543 | -4.5481485 | 5.8360173  |
| H  | -6.9185989 | -3.3550539 | 4.7262588  |
| C  | 0.6591778  | -8.5916395 | 2.6558687  |
| H  | 1.1421849  | -8.3614976 | 1.6758778  |
| H  | -0.1760558 | -9.2930858 | 2.4243309  |
| C  | -7.6629207 | 2.7743979  | -1.5124378 |
| H  | -7.1859673 | 3.7786468  | -1.5983967 |
| H  | -7.5350126 | 2.4665729  | -0.4478028 |
| C  | -0.5905662 | 2.0343571  | -6.8861368 |
| H  | -0.0249967 | 1.0723156  | -6.8867400 |
| H  | -1.4878109 | 1.8621766  | -7.5261803 |
| C  | -0.8529869 | -2.8573620 | -7.2248114 |
| H  | -0.7770214 | -1.7926377 | -6.8992737 |
| H  | 0.1263285  | -3.0991484 | -7.7005387 |
| C  | 3.2554194  | -9.0282408 | -2.4169470 |
| H  | 2.3241576  | -9.5094121 | -2.7981839 |
| H  | 3.1599628  | -9.0153684 | -1.3050819 |
| N  | -2.3213350 | 0.1686991  | 1.8539369  |
| O  | -3.1207361 | 0.7322547  | 2.5566123  |
| O  | -1.7402449 | -0.9441020 | 2.1883635  |
| O  | -1.9657968 | 0.5951528  | 0.6851936  |
| Pu | -0.3802020 | -1.2016549 | 0.1759223  |
| C  | -9.1567825 | 2.8830200  | -1.8429273 |
| H  | -9.6638814 | 3.6083711  | -1.1708215 |



|   |            |             |            |
|---|------------|-------------|------------|
| H | -9.3179637 | 3.2279063   | -2.8887924 |
| H | -9.6727874 | 1.9031989   | -1.7290050 |
| C | 0.2745511  | 3.1413646   | -7.5013791 |
| H | 0.5845650  | 2.8814539   | -8.5365887 |
| H | -0.2766044 | 4.1070853   | -7.5502245 |
| H | 1.1999136  | 3.3131450   | -6.9067666 |
| C | -1.9747967 | -3.0027781  | -8.2600978 |
| H | -1.7976584 | -2.3476205  | -9.1402276 |
| H | -2.0503400 | -4.0485459  | -8.6333710 |
| H | -2.9653030 | -2.7280332  | -7.8316387 |
| C | 4.4722342  | -9.8704820  | -2.8200381 |
| H | 4.3891638  | -10.9079546 | -2.4306617 |
| H | 4.5721307  | -9.9363618  | -3.9263944 |
| H | 5.4176025  | -9.4377293  | -2.4224568 |
| C | 5.8863299  | -4.0166259  | 5.9349072  |
| H | 5.3438716  | -3.6743843  | 6.8474009  |
| H | 5.3223294  | -4.9024056  | 5.5568970  |
| C | 2.7240003  | 4.1503739   | 4.0025561  |
| H | 3.8295180  | 4.2365864   | 3.8834645  |
| H | 2.2927454  | 4.3184276   | 2.9876790  |
| C | 7.3130105  | -4.4356917  | 6.3110729  |
| H | 7.8890680  | -3.5827102  | 6.7341809  |
| H | 7.3044250  | -5.2433793  | 7.0743836  |
| H | 7.8737294  | -4.8155403  | 5.4275346  |
| C | 1.6685573  | -9.2844093  | 3.5798761  |
| H | 2.0627105  | -10.2159633 | 3.1196009  |
| H | 2.5383105  | -8.6257109  | 3.8029465  |
| H | 1.2036579  | -9.5649091  | 4.5513206  |
| C | -8.2060379 | -5.0609540  | 5.1528198  |
| H | -8.1376794 | -6.1478492  | 5.3826688  |
| H | -8.7164102 | -4.5703137  | 6.0092435  |
| H | -8.8624712 | -4.9463247  | 4.2612504  |
| C | 2.2235058  | 5.2368865   | 4.9626145  |
| H | 2.6686724  | 5.1213441   | 5.9762503  |
| H | 2.4914072  | 6.2506933   | 4.5945383  |
| H | 1.1166863  | 5.2023682   | 5.0753958  |

### **Pu(IV)-iso-Amyl DGA**

|   |            |            |            |
|---|------------|------------|------------|
| C | -6.1382121 | -5.0045040 | 3.6077255  |
| C | -4.6892783 | -4.5003831 | 3.4007000  |
| C | -3.9403976 | -5.1979353 | 2.2512736  |
| N | -2.5578288 | -4.7046445 | 2.0671272  |
| C | -2.2328826 | -3.7276327 | 1.2122262  |
| C | -3.3288386 | -3.1163742 | 0.3325254  |
| O | -2.7209405 | -2.0629639 | -0.4053195 |
| C | -3.5685806 | -1.3905566 | -1.3355767 |
| C | -2.6817845 | -0.3522403 | -2.0353994 |
| N | -3.2409107 | 0.5879273  | -2.8008094 |
| C | -4.6969810 | 0.6738236  | -3.0432476 |

|   |            |            |            |
|---|------------|------------|------------|
| C | -5.4210604 | 1.6304209  | -2.0788488 |
| C | -6.9501282 | 1.7148280  | -2.3044803 |
| C | -1.5142637 | -5.3122109 | 2.9207987  |
| C | -0.9209764 | -6.5960206 | 2.3157327  |
| C | 0.1409979  | -7.2807666 | 3.2098375  |
| O | -1.0488187 | -3.2947091 | 1.0897651  |
| O | -0.0742341 | -2.9872947 | -1.4898788 |
| C | 0.9622123  | -3.6651657 | -1.7301070 |
| N | 1.0541119  | -4.5062274 | -2.7720377 |
| C | 2.2548022  | -5.3197736 | -3.0586116 |
| C | 2.1924282  | -6.7418669 | -2.4756935 |
| C | 3.4486972  | -7.6000135 | -2.7631755 |
| O | -1.4303020 | -0.4311278 | -1.8573285 |
| O | 1.7683485  | -2.7470900 | 0.3175684  |
| C | 2.8522885  | -2.3180778 | 1.1337445  |
| C | 2.2883623  | -1.2590035 | 2.0786763  |
| N | 2.9988268  | -0.8048469 | 3.1077798  |
| C | 4.3564358  | -1.2939145 | 3.4330572  |
| C | 4.3639528  | -2.3993196 | 4.5029815  |
| C | 5.7789889  | -2.9097044 | 4.8703298  |
| C | 2.1773759  | -3.5147486 | -0.8103387 |
| O | 1.1243304  | -0.8134145 | 1.8153266  |
| C | -2.3901189 | 1.6404113  | -3.4036942 |
| C | -1.9145740 | 1.3016511  | -4.8253848 |
| C | -1.0149452 | 2.3936836  | -5.4531579 |
| C | 2.4347895  | 0.2648780  | 3.9687793  |
| C | 2.7992897  | 1.6749290  | 3.4723237  |
| C | 2.3461130  | 2.8060585  | 4.4271648  |
| C | -0.0759055 | -4.6387465 | -3.7153036 |
| C | 0.0705269  | -3.7371006 | -4.9531382 |
| C | -1.0705894 | -3.8956965 | -5.9862171 |
| H | -4.7067283 | -3.4022898 | 3.2077265  |
| H | 2.0419467  | -6.6740437 | -1.3720846 |
| H | -3.7397875 | -3.8820954 | -0.3693908 |
| H | -4.1692520 | -2.7262280 | 0.9529967  |
| H | -3.8610623 | -6.2893059 | 2.4370179  |
| H | -4.4994604 | -5.0950423 | 1.2975535  |
| H | -6.6788397 | -4.8828645 | 2.6372758  |
| H | -1.9877524 | -5.5147995 | 3.9037203  |
| H | -0.7243812 | -4.5506802 | 3.0774466  |
| H | -0.4650480 | -6.3393384 | 1.3316530  |
| H | 0.9212620  | -6.5169143 | 3.4475903  |
| H | -4.4213448 | -0.9099064 | -0.8043210 |
| H | -3.9785348 | -2.1215508 | -2.0747859 |
| H | -5.1380280 | -0.3449618 | -2.9951664 |
| H | -4.8196280 | 1.0049528  | -4.0956657 |
| H | -4.9802050 | 2.6501751  | -2.1723704 |
| H | -7.3599254 | 0.6768070  | -2.2333231 |
| H | -1.5254377 | 1.7957150  | -2.7276395 |
| H | -2.9956241 | 2.5697430  | -3.3958049 |
| H | -1.3505488 | 0.3418319  | -4.7870812 |

|   |            |            |            |
|---|------------|------------|------------|
| H | -0.1537494 | 2.5537988  | -4.7603169 |
| H | 3.6585260  | -1.8637432 | 0.5053353  |
| H | 3.2884745  | -3.1820266 | 1.6868453  |
| H | 4.9300292  | -0.4075411 | 3.7757221  |
| H | 4.8548510  | -1.6397647 | 2.5026941  |
| H | 3.8600455  | -2.0238501 | 5.4241587  |
| H | 6.2713088  | -3.2481223 | 3.9257303  |
| H | 2.8336826  | 0.0917672  | 4.9911280  |
| H | 1.3378085  | 0.1198527  | 4.0003971  |
| H | 2.3465560  | 1.8339326  | 2.4656193  |
| H | 2.8013395  | 2.6023355  | 5.4269658  |
| H | 2.5617454  | -4.5048935 | -0.4743456 |
| H | 2.9923686  | -2.9831988 | -1.3579092 |
| H | 3.1595919  | -4.7852024 | -2.6994391 |
| H | 2.3504398  | -5.3548246 | -4.1633753 |
| H | 4.3321416  | -7.0485533 | -2.3571811 |
| H | -1.0039320 | -4.3912406 | -3.1619884 |
| H | -0.1262261 | -5.7097540 | -4.0027945 |
| H | 0.1147449  | -2.6785262 | -4.6096939 |
| H | -2.0355167 | -3.7160111 | -5.4508556 |
| N | 1.3781708  | 0.6083040  | -1.2540696 |
| O | 1.4347112  | -0.6777067 | -1.4155172 |
| O | 2.0894218  | 1.3830371  | -1.8410451 |
| O | 0.4801854  | 0.9718086  | -0.3956496 |
| H | 3.7489084  | -3.2555220 | 4.1381934  |
| H | -5.2206359 | 1.3084959  | -1.0300701 |
| H | -4.1172052 | -4.6356061 | 4.3479670  |
| H | -1.7388545 | -7.3251920 | 2.1061973  |
| H | 1.2932249  | -7.2652117 | -2.8780649 |
| H | 3.9046467  | 1.7381103  | 3.3427392  |
| H | 1.0426803  | -3.9484650 | -5.4586639 |
| C | -6.8503784 | -4.1280875 | 4.6537336  |
| H | -7.9089452 | -4.4427382 | 4.7795980  |
| H | -6.3563164 | -4.2100274 | 5.6485267  |
| H | -6.8497892 | -3.0541802 | 4.3623358  |
| C | 0.8227955  | -8.4243355 | 2.4368469  |
| H | 1.2915269  | -8.0634896 | 1.4932045  |
| H | 1.6184095  | -8.9022709 | 3.0490140  |
| H | 0.0893389  | -9.2177868 | 2.1673690  |
| C | -7.5959888 | 2.5508001  | -1.1850479 |
| H | -7.2269751 | 3.6012724  | -1.2066578 |
| H | -8.7009968 | 2.5826311  | -1.3007065 |
| H | -7.3730410 | 2.1345062  | -0.1772429 |
| C | -0.4499576 | 1.9009612  | -6.7975498 |
| H | 0.2397132  | 2.6533659  | -7.2382782 |
| H | 0.1188638  | 0.9509746  | -6.6824095 |
| H | -1.2655424 | 1.7230646  | -7.5352223 |
| C | -0.9363889 | -2.8255847 | -7.0840481 |
| H | -0.9363780 | -1.7969468 | -6.6591959 |
| H | 0.0107448  | -2.9553211 | -7.6550716 |
| H | -1.7744769 | -2.8925574 | -7.8117500 |

|    |            |            |            |
|----|------------|------------|------------|
| C  | 3.3481684  | -8.9407466 | -2.0134417 |
| H  | 2.4873942  | -9.5430586 | -2.3840807 |
| H  | 4.2672101  | -9.5480171 | -2.1601042 |
| H  | 3.2131178  | -8.7924165 | -0.9184763 |
| N  | -2.3610405 | 0.1401251  | 1.7830903  |
| O  | -3.1761749 | 0.6957659  | 2.4743765  |
| O  | -1.7753622 | -0.9673601 | 2.1241806  |
| O  | -1.9925769 | 0.5719174  | 0.6200198  |
| Pu | -0.3896798 | -1.2134294 | 0.1237249  |
| C  | 5.6654976  | -4.1300790 | 5.8017548  |
| H  | 6.6702555  | -4.5410974 | 6.0400865  |
| H  | 5.1804597  | -3.8546503 | 6.7658743  |
| H  | 5.0676941  | -4.9482050 | 5.3406441  |
| C  | 2.8926648  | 4.1576315  | 3.9327244  |
| H  | 2.4745621  | 4.4197609  | 2.9341567  |
| H  | 2.6199445  | 4.9748291  | 4.6351730  |
| H  | 4.0017077  | 4.1456413  | 3.8453659  |
| C  | -0.4404871 | -7.7939347 | 4.5404080  |
| H  | -1.2469180 | -8.5411472 | 4.3615372  |
| H  | 0.3460974  | -8.2958415 | 5.1448646  |
| H  | -0.8609858 | -6.9802347 | 5.1723452  |
| C  | -6.2002356 | -6.4915463 | 4.0024486  |
| H  | -5.7853265 | -7.1676591 | 3.2214242  |
| H  | -5.6438841 | -6.6776798 | 4.9498026  |
| H  | -7.2526830 | -6.8070780 | 4.1709599  |
| C  | -7.3157054 | 2.2752910  | -3.6912633 |
| H  | -6.8988831 | 3.2990419  | -3.8320162 |
| H  | -6.9508828 | 1.6379947  | -4.5275945 |
| H  | -8.4190082 | 2.3497944  | -3.8038906 |
| C  | -1.1265929 | -5.3056194 | -6.6035526 |
| H  | -0.1729511 | -5.5511127 | -7.1250372 |
| H  | -1.3204138 | -6.1023597 | -5.8513002 |
| H  | -1.9403726 | -5.3724293 | -7.3583195 |
| C  | 3.6826634  | -7.8286697 | -4.2677620 |
| H  | 2.8088747  | -8.3365613 | -4.7366557 |
| H  | 3.8719191  | -6.8847144 | -4.8257983 |
| H  | 4.5690328  | -8.4792789 | -4.4300403 |
| H  | -2.7967771 | 1.1310357  | -5.4879976 |
| C  | -1.7430572 | 3.7393995  | -5.6270710 |
| H  | -1.0752372 | 4.4858366  | -6.1094735 |
| H  | -2.6411803 | 3.6296944  | -6.2778812 |
| H  | -2.0714842 | 4.1822166  | -4.6605372 |
| C  | 0.8173919  | 2.8589143  | 4.6027725  |
| H  | 0.3074647  | 3.0234042  | 3.6253426  |
| H  | 0.4019704  | 1.9309793  | 5.0556687  |
| H  | 0.5303181  | 3.6987422  | 5.2722070  |
| C  | 6.6597390  | -1.8158001 | 5.5017229  |
| H  | 6.8469414  | -0.9588407 | 4.8168730  |
| H  | 6.1980730  | -1.4182346 | 6.4344500  |
| H  | 7.6551242  | -2.2271163 | 5.7763082  |
